# Supplementary material
Source: publisher figshare collection journal article supplement (https://gsapubs.figshare.com/articles/dataset/_/16924129)
Supplement: Supplementary file 1 [file 1]

## Sheet: PlotDat8
Source sheet	Sheet1	0.21997	0.03041	0.218107	0.0315113	0.807407	0.097544	1.6818	0.167804	2.97921	0.242562	4.90427	0.322105	0	0	0	0	0	0	0.217708	0.0315113	0	0.0222849	0.227117	0.0304471	0.220523	0.0294304	0.218334	0.028519	0.205782	0.0292365	0.202673	0.0297951	0.325527	0.0442882	0.310087	0.0398613	1.9076	0.17643	4.64971	0.307575	0.314883	0.0367859	0.831098	0.0968657	0.227117	0.0304471	0.191918	0.0280661
Plot name	Concordia7	0.20542	0.02938	0.218091	0.0315231	0.807335	0.0975817	1.68162	0.167871	2.97884	0.242661	4.90357	0.322241	0.0743382	0.0113583	0.0743382	0.0113386	0.0743382	0.0113781	0.805631	0.097544	6.44585	0.45	0.226827	0.0306522	0.21991	0.0297107	0.216847	0.0287925	0.205491	0.0293835	0.202118	0.0299353	0.325112	0.0445548	0.309723	0.0400904	1.90545	0.177486	4.64571	0.308939	0.312871	0.0370423	0.830295	0.0973409	0.226827	0.0306522	0.19141	0.0283772
Plot Type	1	0.18163	0.02847	0.218043	0.0315339	0.807125	0.0976164	1.6811	0.167932	2.97776	0.242753	4.90152	0.322366	0.154203	0.0228457	0.154203	0.0228057	0.154203	0.0228857	1.67741	0.167804			0.225981	0.0308377	0.218123	0.0299643	0.212507	0.0290399	0.204642	0.0295164	0.2005	0.0300621	0.323904	0.044796	0.308664	0.0402975	1.89917	0.178442	4.63406	0.310173	0.307	0.0372743	0.827954	0.0977707	0.225981	0.0308377	0.18993	0.0286586
1st free col	135	0.19861	0.02921	0.217969	0.031543	0.806794	0.0976451	1.68028	0.167983	2.97606	0.242829	4.89828	0.32247	0.240004	0.0344635	0.240004	0.0344029	0.240004	0.0345242	2.97009	0.242562			0.224648	0.0309886	0.215308	0.0301705	0.205665	0.0292411	0.203305	0.0296245	0.19795	0.0301652	0.322001	0.0449921	0.306996	0.040466	1.88929	0.179219	4.6157	0.311176	0.297745	0.0374629	0.824266	0.0981202	0.224648	0.0309886	0.187597	0.0288874
Sigma Level	2	0.18899	0.02977	0.217873	0.0315494	0.806369	0.0976657	1.67923	0.16802	2.97388	0.242883	4.89412	0.322545	0.332184	0.0462133	0.332184	0.0461315	0.332184	0.0462951	4.8869	0.322105			0.222936	0.0310925	0.211691	0.0303127	0.196876	0.0293799	0.201588	0.0296991	0.194673	0.0302363	0.319556	0.0451273	0.304853	0.0405821	1.87659	0.179755	4.59212	0.311868	0.285856	0.037593	0.819529	0.0983611	0.222936	0.0310925	0.184601	0.0290451
Absolute Errs	TRUE	0.31532	0.04424	0.217764	0.0315528	0.805884	0.0976765	1.67803	0.168039	2.97139	0.242911	4.88937	0.322583	0.431216	0.0580966	0.431216	0.0579932	0.431216	0.0582	IsoLine	IsoLine			0.220983	0.0311412	0.207566	0.0303793	0.186852	0.0294449	0.199629	0.029734	0.190936	0.0302696	0.316768	0.0451906	0.302409	0.0406365	1.86211	0.180006	4.56522	0.312192	0.272295	0.037654	0.814127	0.0984739	0.220983	0.0311412	0.181185	0.029119
Symbol Type	1	0.30114	0.03982	0.217651	0.0315528	0.805378	0.0976765	1.67679	0.168039	2.9688	0.242911	4.88443	0.322583	0.53761	0.0701148	0.53761	0.0699893	0.53761	0.0702403					0.218949	0.0311306	0.203267	0.0303649	0.176405	0.0294309	0.197587	0.0297265	0.187042	0.0302625	0.313863	0.0451768	0.299863	0.0406247	1.84702	0.179951	4.53719	0.312123	0.258163	0.0376409	0.808498	0.0984495	0.218949	0.0311306	0.177625	0.029103
Inverse Plot	FALSE	1.85458	0.17624	0.217542	0.0315494	0.804893	0.0976657	1.67559	0.16802	2.96631	0.242883	4.87969	0.322545	0.651913	0.0822695	0.651913	0.0821215	0.651913	0.0824176					0.216997	0.0310617	0.199143	0.0302708	0.166381	0.0293392	0.195629	0.0296771	0.183305	0.0302154	0.311076	0.0450872	0.29742	0.0405478	1.83254	0.179597	4.5103	0.311665	0.244603	0.0375548	0.803097	0.0982899	0.216997	0.0310617	0.174209	0.0289985
Color Plot	TRUE	4.55122	0.30733	0.217446	0.031543	0.804468	0.0976451	1.67454	0.167983	2.96413	0.242829	4.87553	0.32247	0.774713	0.0945623	0.774713	0.0943912	0.774713	0.0947335					0.215287	0.03094	0.195527	0.0301045	0.157593	0.0291769	0.193912	0.0295899	0.180029	0.0301323	0.308632	0.044929	0.295278	0.0404118	1.81985	0.17897	4.48672	0.310856	0.232714	0.0374028	0.798363	0.0980079	0.215287	0.03094	0.171215	0.0288139
3D plot	FALSE	0.26523	0.03674	0.217372	0.0315339	0.804137	0.0976164	1.67372	0.167932	2.96243	0.242753	4.87229	0.322366	0.906642	0.106995	0.906642	0.1068	0.906642	0.107189					0.213955	0.0307753	0.192713	0.0298795	0.150752	0.0289575	0.192576	0.0294719	0.177479	0.0300198	0.306731	0.0447149	0.293612	0.040228	1.80997	0.178122	4.46836	0.309761	0.223459	0.037197	0.794678	0.0976265	0.213955	0.0307753	0.168885	0.0285641
Linear	FALSE	0.81132	0.09678	0.217324	0.0315231	0.803927	0.0975817	1.6732	0.167871	2.96135	0.242661	4.87024	0.322241	1.04838	0.119568	1.04838	0.11935	1.04838	0.119787					0.213111	0.030581	0.190928	0.029614	0.146412	0.0286985	0.191728	0.0293327	0.175861	0.0298871	0.305525	0.0444624	0.292555	0.0400111	1.80371	0.177122	4.45672	0.308469	0.217588	0.0369542	0.792341	0.0971765	0.213111	0.030581	0.167407	0.0282695
Data Range	H5:K61	0.21997	0.03041	0.217308	0.0315113	0.803855	0.097544	1.67302	0.167804	2.96098	0.242562	4.86953	0.322105	1.20065	0.132285	1.20065	0.132041	1.20065	0.132528					0.212823	0.0303729	0.190317	0.0293296	0.144926	0.028421	0.191438	0.0291835	0.175307	0.0297449	0.305113	0.0441918	0.292193	0.0397787	1.80156	0.17605	4.45273	0.307085	0.215577	0.0366941	0.791542	0.0966943	0.212823	0.0303729	0.166902	0.0279539
Filled Symbols	FALSE	0.17941	0.02801	0.217324	0.0314995	0.803927	0.0975064	1.6732	0.167737	2.96135	0.242462	4.87024	0.321969	1.36424	0.145146	1.36424	0.144877	1.36424	0.145414					0.213113	0.0301678	0.19093	0.0290493	0.146413	0.0281475	0.191729	0.0290365	0.175862	0.0296047	0.305528	0.0439252	0.292557	0.0395496	1.80371	0.174994	4.45673	0.305721	0.217589	0.0364377	0.792345	0.0962191	0.213113	0.0301678	0.16741	0.0276428
ConcAge	FALSE	0.1784	0.0273	0.217372	0.0314886	0.804137	0.0974717	1.67372	0.167676	2.96243	0.24237	4.87229	0.321843	1.54	0.158153	1.54	0.157858	1.54	0.158447					0.213959	0.0299823	0.192717	0.0287957	0.150753	0.0279001	0.192578	0.0289036	0.17748	0.0294779	0.306736	0.043684	0.293616	0.0393425	1.80999	0.174038	4.46838	0.304487	0.22346	0.0362057	0.794686	0.0957893	0.213959	0.0299823	0.16889	0.0273614
ConcSwap	FALSE	0.43234	0.05738	0.217446	0.0314796	0.804468	0.0974429	1.67454	0.167625	2.96413	0.242294	4.87553	0.321739	1.72882	0.171307	1.72882	0.170987	1.72882	0.171628					0.215292	0.0298314	0.195532	0.0285895	0.157595	0.0276989	0.193915	0.0287955	0.18003	0.0293748	0.308639	0.0434879	0.295284	0.039174	1.81987	0.173261	4.48674	0.303484	0.232715	0.0360171	0.798374	0.0954398	0.215292	0.0298314	0.171223	0.0271326
1st Symbol-row	1	1.36423	0.13363	0.217542	0.0314732	0.804893	0.0974224	1.67559	0.167588	2.96631	0.24224	4.87969	0.321665	1.93167	0.184611	1.93167	0.184264	1.93167	0.184959					0.217004	0.0297275	0.199149	0.0284473	0.166384	0.0275601	0.195632	0.0287209	0.183307	0.0293037	0.311084	0.0433527	0.297427	0.0390579	1.83257	0.172725	4.51032	0.302792	0.244604	0.035887	0.803111	0.0951989	0.217004	0.0297275	0.174219	0.0269749
		0.30596	0.0429	0.217651	0.0314698	0.805378	0.0974116	1.67679	0.167569	2.9688	0.242212	4.88443	0.321626	2.14961	0.198067	2.14961	0.197692	2.14961	0.198441					0.218957	0.0296788	0.203274	0.0283807	0.176408	0.0274951	0.197591	0.028686	0.187044	0.0292704	0.313872	0.0432894	0.299871	0.0390035	1.84705	0.172474	4.53722	0.302468	0.258165	0.035826	0.808513	0.0950861	0.218957	0.0296788	0.177635	0.026901
		0.19861	0.02921	0.217764	0.0314698	0.805884	0.0974116	1.67803	0.167569	2.97139	0.242212	4.88937	0.321626	2.38374	0.211675	2.38374	0.211272	2.38374	0.212077					0.220991	0.0296894	0.207573	0.0283951	0.186855	0.0275091	0.199633	0.0286935	0.190938	0.0292775	0.316777	0.0433032	0.302417	0.0390153	1.86214	0.172529	4.56525	0.302537	0.272297	0.0358391	0.814142	0.0951105	0.220991	0.0296894	0.181195	0.026917
		0.18899	0.02977	0.217873	0.0314732	0.806369	0.0974224	1.67923	0.167588	2.97388	0.24224	4.89412	0.321665	2.63528	0.225437	2.63528	0.225006	2.63528	0.225868					0.222943	0.0297583	0.211697	0.0284892	0.196879	0.0276008	0.201591	0.0287429	0.194675	0.0293246	0.319564	0.0433928	0.30486	0.0390922	1.87662	0.172883	4.59214	0.302995	0.285857	0.0359252	0.819543	0.0952701	0.222943	0.0297583	0.184611	0.0270215
		0.48195	0.06515	0.217969	0.0314796	0.806794	0.0974429	1.68028	0.167625	2.97606	0.242294	4.89828	0.321739	2.90552	0.239356	2.90552	0.238896	2.90552	0.239817					0.224653	0.02988	0.215313	0.0286555	0.205667	0.0277631	0.203308	0.0288301	0.197951	0.0294077	0.322008	0.043551	0.307002	0.0392282	1.88931	0.17351	4.61572	0.303804	0.297746	0.0360772	0.824277	0.0955521	0.224653	0.02988	0.187605	0.0272061
		0.223	0.02985	0.218043	0.0314886	0.807125	0.0974717	1.6811	0.167676	2.97776	0.24237	4.90152	0.321843	3.19585	0.253433	3.19585	0.252943	3.19585	0.253923					0.225985	0.0300447	0.218127	0.0288805	0.212508	0.0279825	0.204644	0.0289481	0.200501	0.0295202	0.323909	0.0437651	0.308668	0.039412	1.89919	0.174358	4.63408	0.304899	0.307001	0.036283	0.827962	0.0959335	0.225985	0.0300447	0.189935	0.0274559
		2.21658	0.18386	0.218091	0.0314995	0.807335	0.0975064	1.68162	0.167737	2.97884	0.242462	4.90357	0.321969	3.50777	0.26767	3.50777	0.26715	3.50777	0.268191					0.226829	0.030239	0.219912	0.029146	0.216848	0.0282415	0.205492	0.0290873	0.202119	0.0296529	0.325115	0.0440176	0.309725	0.0396289	1.90545	0.175358	4.64572	0.306191	0.312872	0.0365258	0.830299	0.0963835	0.226829	0.030239	0.191413	0.0277505
		0.38335	0.05294	0.218107	0.0315113	0.807407	0.097544	1.6818	0.167804	2.97921	0.242562	4.90427	0.322105	3.84287	0.282069	3.84287	0.281518	3.84287	0.28262					0.227117	0.0304471	0.220523	0.0294304	0.218334	0.028519	0.205782	0.0292365	0.202673	0.0297951	0.325527	0.0442882	0.310087	0.0398613	1.9076	0.17643	4.64971	0.307575	0.314883	0.0367859	0.831098	0.0968657	0.227117	0.0304471	0.191918	0.0280661
		0.223	0.02985	ConcTikEll	ConcTikEll	ConcTikEll	ConcTikEll	ConcTikEll	ConcTikEll	ConcTikEll	ConcTikEll	ConcTikEll	ConcTikEll	4.20288	0.296631	4.20288	0.296048	4.20288	0.297214
		0.25593	0.03436											4.58965	0.311359	4.58965	0.310744	4.58965	0.311974
		0.24807	0.03571											5.00517	0.326254	5.00517	0.325606	5.00517	0.326902
		0.25593	0.03436											5.45159	0.341318	5.45159	0.340636	5.45159	0.341999
		0.95812	0.10159											5.93119	0.356553	5.93119	0.355837	5.93119	0.357269
		0.37285	0.04939											6.44644	0.371961	6.44644	0.37121	6.44644	0.372712
		0.24807	0.03571											6.99999	0.387544	6.99999	0.386758	6.99999	0.388331
		0.22752	0.03182											7	0.387544	7	0.386758	7	0.388331
		0.28607	0.03831											IsoLine	IsoLine	ConcBand	ConcBand	ConcBand	ConcBand
		0.23835	0.03186
		0.62711	0.07292
		0.22752	0.03182
		0.10593	0.01464
		0.86716	0.09895
		0.28607	0.03831
		1.94153	0.17292
		0.03347	0.00527
		0.51805	0.06426
		2.87737	0.22059
		0.23835	0.03186
		0.31149	0.03986
		0.25347	0.03816
		0.2727	0.03674
		0.41295	0.05537
		0.46921	0.063
		0.46286	0.05514
		0.44722	0.06112
		0.31149	0.03986
		5.24157	0.33602
		0.41773	0.0564
		0.25347	0.03816
		0.2727	0.03674
		IsoLine	IsoLine
[truncated: 84 more columns]

## Sheet: PlotDat12
Source sheet	204-1,208,209	0.17941	0.02801	0.182585	0.026722	0.194309	0.028316	0.206149	0.0299124	0.218107	0.0315113	0.230183	0.0331127	0.176987	0.026	0.17732	0.026	0.176656	0.026	0.182256	0.026722	0.144192	0.026	0.191918	0.0280661	0.218334	0.028519	0.205782	0.0292365	0.205782	0.0292365	0.220523	0.0294304	0.202673	0.0297951	0.202673	0.0297951	0.233733	0.0298844	0.233733	0.0298844	0.227117	0.0304471	0.227117	0.0304471	0.239795	0.0318587	0.268763	0.03189
Plot name	Concordia9	0.18163	0.02847	0.182572	0.026732	0.194295	0.0283266	0.206134	0.0299236	0.218091	0.0315231	0.230166	0.0331251	0.176987	0.026	0.17899	0.0262288	0.176987	0.0260456	0.193957	0.028316	0.273393	0.034	0.191747	0.0282484	0.217977	0.0286546	0.205625	0.0293452	0.205625	0.0293452	0.220316	0.0295947	0.202486	0.0298773	0.202486	0.0298773	0.233587	0.0299966	0.233587	0.0299966	0.22696	0.0305988	0.22696	0.0305988	0.239628	0.0319849	0.268348	0.0319882
Plot Type	1	0.19861	0.02921	0.182533	0.0267412	0.194253	0.0283363	0.20609	0.0299339	0.218043	0.0315339	0.230115	0.0331365	0.17899	0.0262748	0.180997	0.0265032	0.17899	0.0263209	0.205774	0.0299124			0.191239	0.0284243	0.216912	0.0287866	0.205161	0.0294479	0.205161	0.0294479	0.219703	0.0297531	0.201931	0.0299565	0.201931	0.0299565	0.233151	0.0301048	0.233151	0.0301048	0.226498	0.0307422	0.226498	0.0307422	0.23913	0.0321066	0.267115	0.0320828
1st free col	55	0.19861	0.02921	0.182472	0.0267488	0.194188	0.0283444	0.20602	0.0299424	0.217969	0.031543	0.230037	0.033146	0.180997	0.0265497	0.183007	0.0267777	0.180997	0.0265963	0.217708	0.0315113			0.190408	0.0285888	0.21516	0.0289125	0.204411	0.0295403	0.204411	0.0295403	0.218701	0.0299014	0.201023	0.0300306	0.201023	0.0300306	0.232439	0.030206	0.232439	0.030206	0.22575	0.0308711	0.22575	0.0308711	0.238315	0.0322206	0.265097	0.0321714
Sigma Level	2	0.20542	0.02938	0.182393	0.0267543	0.194103	0.0283502	0.20593	0.0299486	0.217873	0.0315494	0.229935	0.0331528	0.183007	0.0268247	0.18502	0.0270522	0.183007	0.0268717	0.229759	0.0331127			0.189277	0.0287375	0.212756	0.0290297	0.203407	0.0296183	0.203407	0.0296183	0.217336	0.0300354	0.199787	0.0300976	0.199787	0.0300976	0.231469	0.0302976	0.231469	0.0302976	0.22475	0.0309798	0.22475	0.0309798	0.237206	0.0323235	0.26235	0.0322516
Absolute Errs	TRUE	0.18899	0.02977	0.182303	0.0267571	0.194007	0.0283532	0.205827	0.0299517	0.217764	0.0315528	0.22982	0.0331563	0.18502	0.0270998	0.187037	0.0273269	0.18502	0.0271473	IsoLine	IsoLine			0.187878	0.0288664	0.209746	0.0291361	0.202194	0.0296784	0.202194	0.0296784	0.215646	0.0301516	0.198257	0.0301557	0.198257	0.0301557	0.230268	0.0303769	0.230268	0.0303769	0.22354	0.0310637	0.22354	0.0310637	0.235832	0.0324128	0.258948	0.032321
Symbol Type	1	0.18899	0.02977	0.182209	0.0267571	0.193907	0.0283532	0.20572	0.0299517	0.217651	0.0315528	0.229699	0.0331563	0.187037	0.0273749	0.189057	0.0276016	0.187037	0.0274229					0.186247	0.0289719	0.206189	0.0292295	0.200824	0.0297181	0.200824	0.0297181	0.213678	0.0302467	0.196473	0.0302033	0.196473	0.0302033	0.228869	0.0304419	0.228869	0.0304419	0.222175	0.031119	0.222175	0.031119	0.234232	0.0324858	0.254984	0.0323778
Inverse Plot	FALSE	0.223	0.02985	0.182119	0.0267543	0.193811	0.0283502	0.205618	0.0299486	0.217542	0.0315494	0.229583	0.0331528	0.189057	0.0276501	0.19108	0.0278764	0.189057	0.0276986					0.18443	0.0290512	0.202154	0.0293081	0.199358	0.0297355	0.199358	0.0297355	0.211484	0.0303181	0.194486	0.030239	0.194486	0.030239	0.22731	0.0304907	0.22731	0.0304907	0.220713	0.0311432	0.220713	0.0311432	0.232449	0.0325408	0.250566	0.0324205
Color Plot	TRUE	0.223	0.02985	0.18204	0.0267488	0.193726	0.0283444	0.205528	0.0299424	0.217446	0.031543	0.229482	0.033146	0.19108	0.0279253	0.193107	0.0281512	0.19108	0.0279743					0.182476	0.0291021	0.197719	0.0293704	0.197858	0.02973	0.197858	0.02973	0.209124	0.030364	0.192348	0.030262	0.192348	0.030262	0.225633	0.030522	0.225633	0.030522	0.219219	0.0311355	0.219219	0.0311355	0.230531	0.032576	0.245815	0.032448
3D plot	FALSE	0.21997	0.03041	0.181979	0.0267412	0.193661	0.0283363	0.205458	0.0299339	0.217372	0.0315339	0.229403	0.0331365	0.193107	0.0282007	0.195138	0.0284261	0.193107	0.0282502					0.180438	0.0291231	0.192971	0.0294152	0.196392	0.0297017	0.196392	0.0297017	0.206664	0.030383	0.190119	0.0302715	0.190119	0.0302715	0.223884	0.030535	0.223884	0.030535	0.217758	0.031096	0.217758	0.031096	0.228531	0.0325906	0.240861	0.0324594
Linear	FALSE	0.21997	0.03041	0.18194	0.026732	0.193619	0.0283266	0.205413	0.0299236	0.217324	0.0315231	0.229353	0.0331251	0.195138	0.0284761	0.197172	0.0287011	0.195138	0.0285261					0.178372	0.0291139	0.188002	0.0294415	0.195022	0.029652	0.195022	0.029652	0.20417	0.0303747	0.187859	0.0302674	0.187859	0.0302674	0.222111	0.0305293	0.222111	0.0305293	0.216393	0.0310266	0.216393	0.0310266	0.226504	0.0325842	0.235838	0.0324544
Data Range	H7:K21	0.22752	0.03182	0.181927	0.026722	0.193605	0.028316	0.205398	0.0299124	0.217308	0.0315113	0.229336	0.0331127	0.197172	0.0287516	0.199209	0.0289762	0.197172	0.0288021					0.176335	0.0290745	0.18291	0.029449	0.19381	0.0295829	0.19381	0.0295829	0.201709	0.0303393	0.18563	0.0302497	0.18563	0.0302497	0.220363	0.0305051	0.220363	0.0305051	0.215185	0.0309302	0.215185	0.0309302	0.224504	0.032557	0.230883	0.0324333
Filled Symbols	FALSE	0.23835	0.03186	0.18194	0.0267121	0.193619	0.0283054	0.205413	0.0299012	0.217324	0.0314995	0.229353	0.0331002	0.199209	0.0290272	0.20125	0.0292514	0.199209	0.0290781					0.174381	0.0290061	0.177792	0.0294374	0.192807	0.0294975	0.192807	0.0294975	0.19935	0.0302776	0.183493	0.0302189	0.183493	0.0302189	0.218686	0.030463	0.218686	0.030463	0.214185	0.0308111	0.214185	0.0308111	0.222587	0.0325097	0.226133	0.0323965
ConcAge	FALSE	0.22752	0.03182	0.181979	0.0267029	0.193661	0.0282957	0.205458	0.0298909	0.217372	0.0314886	0.229403	0.0330888	0.20125	0.0293028	0.203294	0.0295266	0.20125	0.0293543					0.172565	0.0289105	0.172749	0.029407	0.192057	0.0293996	0.192057	0.0293996	0.197157	0.0301915	0.181505	0.0301758	0.181505	0.0301758	0.217128	0.0304042	0.217128	0.0304042	0.213439	0.0306744	0.213439	0.0306744	0.220804	0.0324435	0.221715	0.032345
ConcSwap	FALSE	0.23835	0.03186	0.18204	0.0266953	0.193726	0.0282876	0.205528	0.0298824	0.217446	0.0314796	0.229482	0.0330794	0.203294	0.0295785	0.205342	0.0298019	0.203294	0.0296305					0.170935	0.0287903	0.167879	0.0293583	0.191594	0.0292934	0.191594	0.0292934	0.195189	0.0300833	0.179722	0.0301217	0.179722	0.0301217	0.215729	0.0303303	0.215729	0.0303303	0.212978	0.0305262	0.212978	0.0305262	0.219204	0.0323603	0.217751	0.0322803
1st Symbol-row	1	IsoLine	IsoLine	0.182119	0.0266898	0.193811	0.0282818	0.205618	0.0298762	0.217542	0.0314732	0.229583	0.0330726	0.205342	0.0298543	0.207393	0.0300773	0.205342	0.0299067					0.169536	0.0286489	0.163277	0.0292924	0.191438	0.0291835	0.191438	0.0291835	0.1935	0.0299559	0.178192	0.030058	0.178192	0.030058	0.214529	0.0302433	0.214529	0.0302433	0.212823	0.0303729	0.212823	0.0303729	0.217831	0.0322624	0.214349	0.0322042
				0.182209	0.026687	0.193907	0.0282788	0.20572	0.0298731	0.217651	0.0314698	0.229699	0.033069	0.207393	0.0301302	0.209448	0.0303527	0.207393	0.0301831					0.168407	0.02849	0.159032	0.0292104	0.191595	0.0290748	0.191595	0.0290748	0.192136	0.0298127	0.176956	0.0299864	0.176956	0.0299864	0.213559	0.0301455	0.213559	0.0301455	0.21298	0.0302212	0.21298	0.0302212	0.216723	0.0321525	0.211602	0.0321187
				0.182303	0.026687	0.194007	0.0282788	0.205827	0.0298731	0.217764	0.0314698	0.22982	0.033069	0.209448	0.0304061	0.211506	0.0306282	0.209448	0.0304595					0.167578	0.0283181	0.155226	0.029114	0.192059	0.0289721	0.192059	0.0289721	0.191135	0.0296578	0.176048	0.029909	0.176048	0.029909	0.212847	0.0300397	0.212847	0.0300397	0.213442	0.0300778	0.213442	0.0300778	0.215909	0.0320334	0.209584	0.0320261
				0.182393	0.0266898	0.194103	0.0282818	0.20593	0.0298762	0.217873	0.0314732	0.229935	0.0330726	0.211506	0.0306821	0.213568	0.0309038	0.211506	0.030736					0.167072	0.0281377	0.151935	0.0290051	0.192809	0.0288797	0.192809	0.0288797	0.190523	0.0294953	0.175494	0.0298277	0.175494	0.0298277	0.212413	0.0299287	0.212413	0.0299287	0.21419	0.0299489	0.21419	0.0299489	0.215412	0.0319086	0.208351	0.031929
				0.182472	0.0266953	0.194188	0.0282876	0.20602	0.0298824	0.217969	0.0314796	0.230037	0.0330794	0.213568	0.0309582	0.215633	0.0311795	0.213568	0.0310126					0.166902	0.0279539	0.149222	0.0288858	0.193813	0.0288017	0.193813	0.0288017	0.190317	0.0293296	0.175307	0.0297449	0.175307	0.0297449	0.212267	0.0298156	0.212267	0.0298156	0.21519	0.0298402	0.21519	0.0298402	0.215245	0.0317813	0.207937	0.03183
				0.182533	0.0267029	0.194253	0.0282957	0.20609	0.0298909	0.218043	0.0314886	0.230115	0.0330888	0.215633	0.0312344	0.217702	0.0314552	0.215633	0.0312892					0.167073	0.0277716	0.147139	0.0287584	0.195026	0.0287416	0.195026	0.0287416	0.190524	0.0291653	0.175494	0.0296627	0.175494	0.0296627	0.212413	0.0297034	0.212413	0.0297034	0.2164	0.0297563	0.2164	0.0297563	0.215412	0.0316551	0.208352	0.0317318
				0.182572	0.0267121	0.194295	0.0283054	0.206134	0.0299012	0.218091	0.0314995	0.230166	0.0331002	0.217702	0.0315106	0.219775	0.031731	0.217702	0.031566					0.167581	0.0275957	0.145728	0.0286254	0.196396	0.0287019	0.196396	0.0287019	0.191137	0.0290069	0.176049	0.0295835	0.176049	0.0295835	0.212849	0.0295952	0.212849	0.0295952	0.217765	0.029701	0.217765	0.029701	0.21591	0.0315334	0.209585	0.0316372
				0.182585	0.026722	0.194309	0.028316	0.206149	0.0299124	0.218107	0.0315113	0.230183	0.0331127	0.219775	0.0317869	0.22185	0.0320069	0.219775	0.0318428					0.168412	0.0274312	0.145015	0.0284893	0.197862	0.0286845	0.197862	0.0286845	0.192139	0.0288586	0.176957	0.0295094	0.176957	0.0295094	0.213561	0.029494	0.213561	0.029494	0.219227	0.0296768	0.219227	0.0296768	0.216725	0.0314194	0.211603	0.0315486
				ConcTikEll	ConcTikEll	ConcTikEll	ConcTikEll	ConcTikEll	ConcTikEll	ConcTikEll	ConcTikEll	ConcTikEll	ConcTikEll	0.22185	0.0320633	0.22393	0.0322829	0.22185	0.0321196					0.169543	0.0272825	0.145016	0.0283529	0.199362	0.02869	0.199362	0.02869	0.193504	0.0287246	0.178193	0.0294424	0.178193	0.0294424	0.214531	0.0294024	0.214531	0.0294024	0.220721	0.0296845	0.220721	0.0296845	0.217834	0.0313165	0.21435	0.0314684
														0.22393	0.0323397	0.226013	0.0325589	0.22393	0.0323966					0.170942	0.0271536	0.145728	0.0282188	0.200828	0.0287183	0.200828	0.0287183	0.195194	0.0286084	0.179723	0.0293843	0.179723	0.0293843	0.215732	0.0293231	0.215732	0.0293231	0.222182	0.029724	0.222182	0.029724	0.219208	0.0312272	0.217752	0.031399
														0.226013	0.0326163	0.228099	0.032835	0.226013	0.0326736					0.172573	0.0270481	0.14714	0.0280895	0.202198	0.028768	0.202198	0.028768	0.197162	0.0285133	0.181507	0.0293367	0.181507	0.0293367	0.217131	0.0292581	0.217131	0.0292581	0.223547	0.0297934	0.223547	0.0297934	0.220808	0.0311542	0.221716	0.0313422
														0.228099	0.0328929	0.230189	0.0331112	0.228099	0.0329507					0.17439	0.0269688	0.149223	0.0279677	0.20341	0.0288371	0.20341	0.0288371	0.199356	0.0284419	0.183494	0.029301	0.183494	0.029301	0.21869	0.0292093	0.21869	0.0292093	0.224755	0.0298898	0.224755	0.0298898	0.222591	0.0310992	0.226134	0.0312995
														0.230189	0.0331695	0.232283	0.0333874	0.230189	0.0332279					0.176344	0.0269179	0.151937	0.0278556	0.204413	0.0289225	0.204413	0.0289225	0.201716	0.028396	0.185632	0.029278	0.185632	0.029278	0.220367	0.029178	0.220367	0.029178	0.225755	0.0300089	0.225755	0.0300089	0.224509	0.031064	0.230885	0.031272
														0.232283	0.0334463	0.23438	0.0336638	0.232283	0.0335051					0.178382	0.0268969	0.155228	0.0277555	0.205163	0.0290204	0.205163	0.0290204	0.204176	0.028377	0.187861	0.0292685	0.187861	0.0292685	0.222116	0.029165	0.222116	0.029165	0.226501	0.0301456	0.226501	0.0301456	0.226509	0.0310494	0.235839	0.0312606
														0.23438	0.0337231	0.236481	0.0339402	0.23438	0.0337824					0.180448	0.0269061	0.159034	0.0276693	0.205626	0.0291266	0.205626	0.0291266	0.20667	0.0283853	0.190121	0.0292726	0.190121	0.0292726	0.223889	0.0291707	0.223889	0.0291707	0.226962	0.0302938	0.226962	0.0302938	0.228536	0.0310558	0.240862	0.0312656
														0.236481	0.034	0.236936	0.034	0.236027	0.034					0.182485	0.0269455	0.163279	0.0275986	0.205782	0.0292365	0.205782	0.0292365	0.209131	0.0284207	0.19235	0.0292903	0.19235	0.0292903	0.225637	0.0291949	0.225637	0.0291949	0.227117	0.0304471	0.227117	0.0304471	0.230536	0.031083	0.245817	0.0312867
														0.236481	0.034	ConcBand	ConcBand	ConcBand	ConcBand					0.184439	0.0270139	0.167882	0.027545					0.21149	0.0284824	0.194487	0.0293211	0.194487	0.0293211	0.227314	0.029237	0.227314	0.029237					0.232453	0.0311303	0.250567	0.0313235
														IsoLine	IsoLine									0.186255	0.0271095	0.172752	0.0275093					0.213683	0.0285685	0.196475	0.0293642	0.196475	0.0293642	0.228872	0.0292958	0.228872	0.0292958					0.234236	0.0311965	0.254985	0.031375
																								0.187885	0.0272297	0.177795	0.0274924					0.215651	0.0286767	0.198258	0.0294183	0.198258	0.0294183	0.230271	0.0293697	0.230271	0.0293697					0.235836	0.0312797	0.258949	0.0314397
																								0.189284	0.0273711	0.182912	0.0274944					0.21734	0.0288041	0.199788	0.029482	0.199788	0.029482	0.231471	0.0294567	0.231471	0.0294567					0.237209	0.0313776	0.262351	0.0315158
																								0.190413	0.02753	0.188005	0.0275155					0.218704	0.0289473	0.201024	0.0295536	0.201024	0.0295536	0.232441	0.0295545	0.232441	0.0295545					0.238317	0.0314875	0.265098	0.0316013
																								0.191242	0.0277019	0.192973	0.0275551					0.219705	0.0291022	0.201932	0.029631	0.201932	0.029631	0.233153	0.0296603	0.233153	0.0296603					0.239131	0.0316066	0.267116	0.0316939
																								0.191748	0.0278823	0.197721	0.0276126					0.220317	0.0292647	0.202486	0.0297123	0.202486	0.0297123	0.233587	0.0297713	0.233587	0.0297713					0.239628	0.0317314	0.268349	0.031791
																								0.191918	0.0280661	0.202156	0.0276867					0.220523	0.0294304	0.202673	0.0297951	0.202673	0.0297951	0.233733	0.0298844	0.233733	0.0298844					0.239795	0.0318587	0.268763	0.03189
																										0.206191	0.0277761
																										0.209748	0.027879
																										0.212757	0.0279934
																										0.215161	0.028117
																										0.216912	0.0282476
																										0.217977	0.0283824
																										0.218334	0.028519
[truncated: 4 more columns]

## Sheet: PlotDat14
Source sheet	204-1,208,209	0.3	187.052	1	174	4
Plot name	Average11	12.7	187.052	2	178	6
Plot Type	15			3	181	5
1st free col	8			4	186	3
Sigma Level	2			5	186	3
Absolute Errs	TRUE			6	187	5
Symbol Type	1			7	189	3
Inverse Plot	FALSE			8	189	3
Color Plot	TRUE			9	190	4
3D plot	FALSE			10	190	4
Linear	FALSE			11	193	4
Data Range	T6:U17			12	193	4
Filled Symbols	FALSE			IsoLine	IsoLine	IsoLine	IsoLine
ConcAge	FALSE
ConcSwap	FALSE
1st Symbol-row	1

## Sheet: PlotDat17
Source sheet	204-1,208,209	0	0	160	0	0	0
Plot name	ProbDens14	5.88235	0	200	0	1994.12	0
Plot Type	16	11.7647	0	200	12
1st free col	9	17.6471	0	160	12
Sigma Level	2	23.5294	0	160	0
Absolute Errs	TRUE	29.4118	0	ErrBox	ErrBox
Symbol Type	1	35.2941	0	200	0
Inverse Plot	FALSE	41.1765	0	240	0
Color Plot	TRUE	47.0588	0	240	11
3D plot	FALSE	52.9412	0	200	11
Linear	FALSE	58.8235	0	200	0
Data Range	T6:U59	64.7059	0	ErrBox	ErrBox
Filled Symbols	TRUE	70.5882	0	240	0
ConcAge	FALSE	76.4706	0	280	0
ConcSwap	FALSE	82.3529	0	280	8
1st Symbol-row	1	88.2353	0	240	8
		94.1176	0	240	0
		100	0	ErrBox	ErrBox
		105.882	0	280	0
		111.765	0	320	0
		117.647	0	320	1
		123.529	0	280	1
		129.412	0	280	0
		135.294	0	ErrBox	ErrBox
		141.176	0	320	0
		147.059	0	360	0
		152.941	0	360	3
		158.824	0	320	3
		164.706	2.1599e-07	320	0
		170.588	0.00100897	ErrBox	ErrBox
		176.471	0.00459406	360	0
		182.353	0.00459204	400	0
		188.235	0.0206123	400	3
		194.118	0.00751364	360	3
		200	0.00880791	360	0
		205.882	0.00151337	ErrBox	ErrBox
		211.765	5.90679e-05	400	0
		217.647	0.00751889	440	0
		223.529	0.00390684	440	2
		229.412	0.0050102	400	2
		235.294	0.00612262	400	0
		241.176	0.0158674	ErrBox	ErrBox
		247.059	0.00183284	440	0
		252.941	0.00908238	480	0
		258.824	0.00015821	480	1
		264.706	0.000128012	440	1
		270.588	0.0030044	440	0
		276.471	0.000277886	ErrBox	ErrBox
		282.353	1.01292e-07	560	0
		288.235	0	600	0
		294.118	0	600	1
		300	3.05523e-06	560	1
		305.882	0.000592328	560	0
		311.765	0.00245674	ErrBox	ErrBox
		317.647	0.000217989	600	0
		323.529	4.76442e-07	640	0
		329.412	6.20193e-06	640	2
		335.294	0.000155097	600	2
		341.176	0.00134451	600	0
		347.059	0.0043409	ErrBox	ErrBox
		352.941	0.00341722	800	0
		358.824	0.00272227	840	0
		364.706	0.000974363	840	1
		370.588	6.79997e-05	800	1
		376.471	0.000624921	800	0
		382.353	0.00216465	ErrBox	ErrBox
		388.235	0.000688593	1040	0
		394.118	0.00357533	1080	0
		400	0.00211599	1080	1
		405.882	0.00300643	1040	1
		411.765	0.000957951	1040	0
		417.647	2.30906e-05	ErrBox	ErrBox
		423.529	1.14765e-07	1080	0
		429.412	2.27637e-06	1120	0
		435.294	3.06082e-05	1120	1
		441.176	0.000203119	1080	1
		447.059	0.00066524	1080	0
		452.941	0.00107528	ErrBox	ErrBox
		458.824	0.000857796	1160	0
		464.706	0.000337724	1200	0
		470.588	6.5623e-05	1200	1
		476.471	6.29314e-06	1160	1
		482.353	2.97848e-07	1160	0
		488.235	0	ErrBox	ErrBox
		494.118	0	1360	0
		500	0	1400	0
		505.882	0	1400	1
		511.765	0	1360	1
		517.647	0	1360	0
		523.529	0	ErrBox	ErrBox
		529.412	0	1600	0
		535.294	0	1640	0
		541.176	0	1640	1
		547.059	0	1600	1
		552.941	0	1600	0
		558.824	0	ErrBox	ErrBox
		564.706	0	1720	0
		570.588	0	1760	0
		576.471	4.16709e-08	1760	1
		582.353	1.33333e-05	1720	1
		588.235	0.000466988	1720	0
		594.118	0.00197737	ErrBox	ErrBox
		600	0.00142108	1840	0
		605.882	0.00117109	1880	0
		611.765	0.0011494	1880	1
		617.647	0.00111379	1840	1
		623.529	0.00133252	1840	0
		629.412	0.00085001	ErrBox	ErrBox
		635.294	0.000215963
		641.176	2.1079e-05
		647.059	7.87476e-07
		652.941	0
		658.824	0
		664.706	0
		670.588	0
		676.471	0
		682.353	0
		688.235	0
		694.118	0
		700	0
		705.882	0
		711.765	0
		717.647	0
		723.529	0
		729.412	0
		735.294	0
		741.176	0
		747.059	0
		752.941	0
		758.824	0
		764.706	0
		770.588	0
		776.471	8.34837e-08
		782.353	1.84244e-06
		788.235	2.19801e-05
		794.118	0.000141746
		800	0.000494124
		805.882	0.000931121
		811.765	0.000948463
		817.647	0.000522252
		823.529	0.000155448
		829.412	2.50111e-05
		835.294	2.17533e-06
		841.176	1.02273e-07
		847.059	0
		852.941	0
		858.824	0
		864.706	0
		870.588	0
		876.471	0
		882.353	0
		888.235	0
		894.118	0
		900	0
		905.882	0
		911.765	0
		917.647	0
		923.529	0
		929.412	0
		935.294	0
		941.176	0
		947.059	0
		952.941	0
		958.824	0
		964.706	0
		970.588	0
		976.471	0
		982.353	0
		988.235	1.95526e-08
		994.118	5.4618e-08
		1000	1.44023e-07
		1005.88	3.58501e-07
		1011.76	8.42393e-07
		1017.65	1.86855e-06
		1023.53	3.91253e-06
		1029.41	7.7335e-06
		1035.29	1.48278e-05
		1041.18	3.19551e-05
		1047.06	0.000100325
		1052.94	0.000345047
		1058.82	0.000821474
		1064.71	0.00115181
		1070.59	0.000950558
		1076.47	0.000541386
		1082.35	0.000335936
		1088.24	0.000303901
		1094.12	0.000310384
		1100	0.000306644
		1105.88	0.000286479
		1111.76	0.000252648
		1117.65	0.000210331
		1123.53	0.000165293
		1129.41	0.000122623
		1135.29	8.58724e-05
		1141.18	5.68475e-05
		1147.06	3.61726e-05
		1152.94	2.59717e-05
		1158.82	3.70574e-05
		1164.71	9.88408e-05
		1170.59	0.000249951
		1176.47	0.000481745
		1182.35	0.00068328
		1188.24	0.000709117
		1194.12	0.000537891
		1200	0.000298137
		1205.88	0.000120727
		1211.76	3.57229e-05
		1217.65	7.72297e-06
		1223.53	1.21988e-06
		1229.41	1.40782e-07
		1235.29	0
		1241.18	0
		1247.06	0
		1252.94	0
		1258.82	0
		1264.71	0
		1270.59	0
		1276.47	0
		1282.35	0
		1288.24	0
		1294.12	2.29338e-08
		1300	8.90678e-08
		1305.88	3.12649e-07
		1311.76	9.91941e-07
		1317.65	2.8445e-06
		1323.53	7.37258e-06
		1329.41	1.72713e-05
		1335.29	3.65697e-05
		1341.18	6.99858e-05
		1347.06	0.000121057
		1352.94	0.000189262
		1358.82	0.000267442
		1364.71	0.000341575
		1370.59	0.000394308
		1376.47	0.000411412
		1382.35	0.000387981
		1388.24	0.000330701
		1394.12	0.000254773
		1400	0.000177404
		1405.88	0.000111652
		1411.76	6.35124e-05
		1417.65	3.26546e-05
		1423.53	1.51748e-05
		1429.41	6.3737e-06
		1435.29	2.41966e-06
		1441.18	8.30248e-07
		1447.06	2.57486e-07
		1452.94	7.21759e-08
		1458.82	0
		1464.71	0
		1470.59	0
		1476.47	0
		1482.35	0
		1488.24	0
		1494.12	0
		1500	0
		1505.88	0
		1511.76	0
		1517.65	0
		1523.53	6.14776e-08
		1529.41	1.84897e-07
		1535.29	5.15983e-07
		1541.18	1.33607e-06
		1547.06	3.21008e-06
		1552.94	7.15635e-06
		1558.82	1.48033e-05
		1564.71	2.84129e-05
		1570.59	5.06015e-05
		1576.47	8.36184e-05
		1582.35	0.000128213
		1588.24	0.000182411
		1594.12	0.000240802
		1600	0.000294959
		1605.88	0.000335237
		1611.76	0.000353536
		1617.65	0.000345944
		1623.53	0.000314101
		1629.41	0.00026462
		1635.29	0.000206855
		1641.18	0.000150038
		1647.06	0.000100978
		1652.94	6.30582e-05
		1658.82	3.65382e-05
		1664.71	1.96446e-05
		1670.59	9.80012e-06
		1676.47	4.53638e-06
		1682.35	1.9484e-06
		1688.24	7.76491e-07
		1694.12	2.87135e-07
		1700	9.85204e-08
		1705.88	6.39476e-08
		1711.76	8.48981e-07
		1717.65	1.19582e-05
		1723.53	9.10498e-05
		1729.41	0.000374745
		1735.29	0.000833755
		1741.18	0.00100273
		1747.06	0.000651893
		1752.94	0.000229093
		1758.82	4.35203e-05
		1764.71	4.46907e-06
		1770.59	2.48077e-07
		1776.47	0
		1782.35	0
		1788.24	0
		1794.12	0
		1800	0
		1805.88	0
		1811.76	0
		1817.65	2.20268e-08
		1823.53	3.58448e-07
		1829.41	3.8052e-06
		1835.29	2.63514e-05
		1841.18	0.000119043
		1847.06	0.000350819
		1852.94	0.000674427
		1858.82	0.000845791
		1864.71	0.000691937
		1870.59	0.000369271
		1876.47	0.000128558
		1882.35	2.91964e-05
		1888.24	4.32548e-06
		1894.12	4.18037e-07
		1900	2.63555e-08
		1905.88	0
		1911.76	0
		1917.65	0
		1923.53	0
		1929.41	0
		1935.29	0
		1941.18	0
		1947.06	0
		1952.94	0
		1958.82	0
		1964.71	0
		1970.59	0
		1976.47	0
		1982.35	0
		1988.24	0
		1994.12	0
		IsoLine	IsoLine

## Sheet: PlotDat2
Source sheet	204-2,3	0.3	249.183	1	243	6
Plot name	Average1	18.7	249.183	2	243	6
Plot Type	15			3	245	4
1st free col	8			4	245	4
Sigma Level	2			5	246	5
Absolute Errs	TRUE			6	246	5
Symbol Type	1			7	247	5
Inverse Plot	FALSE			8	247	5
Color Plot	TRUE			9	248	4
3D plot	FALSE			10	248	4
Linear	FALSE			11	251	4
Data Range	T3:U20			12	251	4
Filled Symbols	FALSE			13	253	4
ConcAge	FALSE			14	253	5
ConcSwap	FALSE			15	253	4
1st Symbol-row	1			16	253	5
				17	257	6
				18	257	6
				IsoLine	IsoLine	IsoLine	IsoLine

## Sheet: PlotDat3
Source sheet	204-2,3	0.3	249.2	1	243	6
Plot name	Average2	18.7	249.2	2	243	6
Plot Type	15			3	245	4
1st free col	8			4	245	4
Sigma Level	2			5	246	5
Absolute Errs	TRUE			6	246	5
Symbol Type	1			7	247	5
Inverse Plot	FALSE			8	247	5
Color Plot	TRUE			9	248	4
3D plot	FALSE			10	248	4
Linear	FALSE			11	251	4
Data Range	T3:U20			12	251	4
Filled Symbols	FALSE			13	253	4
ConcAge	FALSE			14	253	5
ConcSwap	FALSE			15	253	4
1st Symbol-row	1			16	253	5
				17	257	6
				18	257	6
				IsoLine	IsoLine	IsoLine	IsoLine

## Sheet: Sheet1
					35	36	37	38	39	40	49	50	51	52	53	54
Supplementary Table S1 Zircon U-Pb data table
Analysis	Pb	Th	U	Th/U	207Pb/206Pb		207Pb/235U		206Pb/238U		207Pb/206Pb		207Pb/235U		206Pb/238U		Concordance
	Total	232	238		Ratio	1s	Ratio	1s	Ratio	1s	Age (Ma)	1s	Age (Ma)	1s	Age (Ma)	1s
JK01 01	5.96513	77.257	144.624	0.534193	0.0556877	0.00497782	0.147305	0.0112947	0.0198839	0.000355583	438.935	199.975	139.529	9.99642	126.922	2.24859	90%
JK01 03	56.8183	1459.95	683.327	2.13653	0.0539249	0.00350414	0.139902	0.00798014	0.0189982	0.000327636	368.57	148.132	132.957	7.10899	121.322	2.07374	90%
JK01 04	3.6147	62.1847	93.8351	0.662701	0.0547088	0.00562711	0.143146	0.0146636	0.0195545	0.000550185	466.71	233.3	135.842	13.0251	124.84	3.47935	91%
JK01 05	8.94615	157.152	334.13	0.470331	0.0498271	0.00296912	0.133398	0.00928549	0.0190173	0.000284518	187.12	138.87	127.146	8.31909	121.442	1.80109	95%
JK01 06	3.63249	52.4039	105.683	0.495861	0.0625353	0.0168664	0.144353	0.0313259	0.0195372	0.000527952	692.29	491.045	136.914	27.7956	124.73	3.33886	90%
JK01 08	9.45161	169.659	309.248	0.548616	0.0547743	0.0024702	0.145464	0.00632211	0.0195542	0.000314742	466.71	101.84	137.899	5.60495	124.838	1.99118	90%
JK01 09	11.024	204.581	323.639	0.632126	0.0526701	0.00304695	0.136844	0.00771993	0.018985	0.000310258	322.28	133.315	130.229	6.8957	121.238	1.96388	92%
JK01 10	7.19363	133.537	267.106	0.49994	0.0533505	0.00272554	0.144188	0.00745968	0.0195142	0.000274091	342.65	110.175	136.767	6.62057	124.585	1.73439	90%
JK01 12	3.75374	43.0858	174.39	0.247066	0.0552792	0.00373668	0.142953	0.00891476	0.0194046	0.000384679	433.38	151.835	135.67	7.92029	123.892	2.43352	90%
JK01 13	9.38337	176.444	342.584	0.515039	0.0468056	0.00269562	0.125101	0.00680286	0.0197012	0.000305697	38.985	133.32	119.686	6.14	125.767	1.93377	95%
JK01 14	13.9379	264.691	445.758	0.593799	0.0499529	0.00194562	0.132914	0.00515026	0.019452	0.000250903	194.525	90.725	126.713	4.61677	124.191	1.58798	97%
JK01 15	5.33144	78.9007	231.416	0.340947	0.0492647	0.0030608	0.129373	0.00722014	0.0195169	0.000402824	161.195	144.425	123.535	6.49194	124.602	2.54795	99%
JK01 16	7.18913	119.051	311.272	0.382467	0.0495026	0.00288424	0.130783	0.0075324	0.0194831	0.000335776	172.305	137.018	124.801	6.76423	124.388	2.12424	99%
JK01 17	7.42033	116.536	273.909	0.425457	0.0527623	0.00327103	0.139745	0.00818285	0.0195195	0.000338365	320.43	140.722	132.816	7.29055	124.618	2.14054	93%
JK01 18	14.2453	295.735	337.402	0.876507	0.0499103	0.00395919	0.129425	0.0100789	0.0189548	0.000350361	190.82	174.05	123.581	9.06156	121.047	2.21752	97%
JK01 19	7.22418	128.627	223.825	0.574677	0.0509264	0.00278879	0.131598	0.00688432	0.0191704	0.000332507	238.955	130.537	125.533	6.17789	122.41	2.1042	97%
JK01 21	6.09799	65.7073	183.736	0.357619	0.0486658	0.00390746	0.124205	0.00941418	0.0189494	0.000455042	131.57	177.75	118.877	8.50328	121.013	2.87958	98%
JK01 22	6.56649	103.73	260.708	0.397878	0.0493127	0.00240418	0.128833	0.00632471	0.01917	0.000300458	161.195	108.317	123.049	5.68968	122.408	1.9016	99%
JK01 23	7.55821	117.23	303.007	0.386887	0.0505009	0.00207493	0.132351	0.00499142	0.0192606	0.000266594	216.74	94.43	126.208	4.47665	122.981	1.68741	97%
JK01 24	4.027	70.8899	199.832	0.354747	0.0480799	0.00283307	0.126086	0.00713519	0.0194008	0.000359298	101.94	133.31	120.575	6.43426	123.868	2.27309	97%
LD1887-3 01	12.1456	215.034	275.915	0.779347	0.0533342	0.00332899	0.140951	0.00919462	0.0190645	0.000542347	342.65	142.572	133.891	8.1832	121.741	3.43142	90%
LD1887-3 02	17.0784	362.031	317.727	1.13944	0.0522016	0.00247077	0.13787	0.00615904	0.0192184	0.000275817	294.505	104.615	131.145	5.49676	122.714	1.74576	93%
LD1887-3 08	18.5149	400.472	339.556	1.1794	0.0513549	0.00308056	0.130144	0.00778852	0.018369	0.000312947	257.47	134.24	124.227	6.99815	117.34	1.98201	94%
LD1887-3 10	12.5856	258.033	308.119	0.837444	0.050333	0.00431859	0.123123	0.0115035	0.0174276	0.000402163	209.33	188.87	117.899	10.4003	111.378	2.54881	94%
LD1887-3 14	14.5478	312.229	302.275	1.03293	0.0507256	0.00255069	0.127952	0.0062485	0.0184259	0.000285239	227.845	114.797	122.256	5.62552	117.7	1.80662	96%
LD1887-3 15	30.6639	790.337	592.493	1.33392	0.0528851	0.00267759	0.120607	0.00667387	0.0164574	0.00040605	324.13	112.022	115.622	6.04771	105.227	2.57581	90%
LD1887-3 16	15.4855	367.343	321.793	1.14155	0.0450275	0.00264652	0.111658	0.00685357	0.0179105	0.000289901	error		107.481	6.26044	114.437	1.83698	93%
LD1887-3 17	18.882	423.455	425.888	0.994289	0.0523837	0.00306365	0.13136	0.00844043	0.0179081	0.000358616	301.91	133.315	125.319	7.57568	114.422	2.27196	90%
EL03-L1-01	61.2682	562.495	863.56	0.651368	0.0542203	0.00148597	0.41036	0.0118626	0.0548303	0.000664362	388.94	61.105	349.134	8.54373	344.109	4.06438	98%
EL03-L1-02	323.782	357.149	735.731	0.485434	0.115616	0.00241384	5.38011	0.120811	0.336335	0.00339921	1900	38.1175	1881.69	19.2694	1869.01	16.4287	99%
EL03-L1-03	606.908	565.952	1062.64	0.53259	0.153826	0.00293491	8.85623	0.177635	0.416114	0.00396769	2390.74	27.3125	2323.3	18.368	2242.82	18.1022	96%
EL03-L1-04	670.129	329.967	1666.16	0.198041	0.114953	0.00197083	5.24537	0.118723	0.329562	0.00521514	1879.63	30.865	1860.02	19.3436	1836.26	25.3052	98%
EL03-L1-05	429.66	342.808	704.129	0.486853	0.168852	0.00288163	11.2678	0.253227	0.482744	0.00800835	2546.6	29.17	2545.54	21.0306	2539.21	34.8443	99%
EL03-L1-06	521.237	565.669	1148.02	0.492733	0.116416	0.00202886	5.59814	0.108041	0.347305	0.00365339	1902.16	31.485	1915.81	16.6774	1921.72	17.511	99%
EL03-L1-07	343.363	359.662	755.841	0.475843	0.116205	0.00211388	5.47015	0.10424	0.339916	0.00289804	1898.46	32.8725	1895.92	16.4094	1886.26	13.9798	99%
EL03-L1-08	478.549	540.041	1067.72	0.50579	0.114709	0.00223597	5.39365	0.120512	0.339418	0.00433215	1875.93	35.185	1883.85	19.1815	1883.87	20.8748	99%
EL03-L1-10	481.003	332.919	1244.39	0.267537	0.115831	0.00207455	4.88035	0.0919613	0.304164	0.00247963	1894.44	31.9425	1798.87	15.9264	1711.92	12.2915	95%
EL03-L1-11	103.159	616.39	619.001	0.995781	0.0634712	0.0014865	0.999925	0.0241771	0.113891	0.00112951	724.08	49.995	703.772	12.2843	695.306	6.54759	98%
EL03-L1-12	442.745	309.663	1044.07	0.296593	0.114801	0.00180152	5.28491	0.0859894	0.333108	0.00283996	1876.86	27.775	1866.43	13.9502	1853.43	13.7694	99%
EL03-L1-13	319.175	242.808	723.142	0.335768	0.114946	0.00174343	5.44627	0.0845397	0.343029	0.00300357	1879.63	27.1575	1892.17	13.3783	1901.23	14.4534	99%
EL03-L1-14	372.77	349.966	868.528	0.402941	0.111826	0.00170787	5.09907	0.0950863	0.330023	0.00464897	1829.32	23.15	1835.95	15.8793	1838.49	22.5547	99%
EL03-L1-15	203.332	215.255	457.323	0.470684	0.112455	0.0017571	5.18726	0.0819543	0.333595	0.00250356	1839.2	61.2675	1850.53	13.5082	1855.78	12.1433	99%
EL03-L1-16	618.381	329.587	1548.29	0.212871	0.111657	0.00161183	5.06488	0.0960397	0.327939	0.00465174	1827.78	21.3	1830.24	16.1271	1828.38	22.6032	99%
EL03-L1-17	404.997	125.029	933.701	0.133907	0.110824	0.00183516	5.39921	0.0883323	0.352185	0.00249209	1813.27	29.785	1884.73	14.0744	1945.02	11.9272	96%
EL03-L1-18	280.917	461.053	578.825	0.796534	0.111952	0.00261068	5.17761	0.116702	0.335639	0.0037656	1831.17	42.285	1848.94	19.2229	1865.66	18.2025	99%
EL03-L1-19	337.258	148.483	775.048	0.19158	0.112219	0.00164307	5.42559	0.0830122	0.350049	0.00346396	1835.5	26.39	1888.91	13.1805	1934.83	16.5732	97%
EL03-L1-20	459.074	368.202	1085.34	0.339249	0.110427	0.00166608	4.9464	0.0837213	0.32364	0.0035465	1806.48	23.15	1810.21	14.3488	1807.48	17.2998	99%
EL03-L1-21	431.531	382.557	960.114	0.39845	0.113899	0.00235075	5.249	0.106281	0.33287	0.00254075	1862.66	37.04	1860.61	17.3156	1852.28	12.329	99%
EL03-L1-22	1018.9	190.075	3562.59	0.0533532	0.110667	0.00173554	3.52245	0.0567023	0.229755	0.00199855	1810.18	27.7775	1532.27	12.7734	1333.22	10.5012	86%
EL03-L1-23	473.345	267.398	1088.2	0.245724	0.111708	0.00209804	5.1613	0.0989804	0.334497	0.00406454	1827.78	33.1825	1846.26	16.3602	1860.14	19.6598	99%
EL03-L1-24	660.66	541.679	1575.56	0.3438	0.109892	0.00213217	4.92231	0.121559	0.323226	0.00576424	1798.15	35.1875	1806.09	20.8775	1805.46	28.0988	99%
EL03-L1-25	371.761	285.091	1001.67	0.284615	0.112372	0.00231671	4.44226	0.0980194	0.284957	0.00331423	1838.89	32.41	1720.26	18.3252	1616.28	16.6498	93%
EL03-L1-26	384.567	155.988	922.226	0.169142	0.112724	0.00220548	5.18524	0.111114	0.332204	0.00436265	1843.52	35.185	1850.2	18.2841	1849.05	21.1341	99%
EL03-L1-27	523.886	453.923	1195.51	0.379689	0.10981	0.00188611	4.92011	0.0852209	0.323142	0.00258955	1795.99	31.6375	1805.71	14.6681	1805.06	12.654	99%
EL03-L1-29	531.177	277.916	1246.49	0.222958	0.111817	0.00169829	5.10505	0.0868867	0.329322	0.00326293	1829.32	23.15	1836.95	14.5048	1835.1	15.8543	99%
EL03-L1-30	547.522	478.212	1245.02	0.384101	0.112485	0.00168746	5.1291	0.0861812	0.328964	0.00302053	1839.82	60.1875	1840.94	14.3321	1833.36	14.6851	99%
EL03-L1-31	703.975	154.243	1792.8	0.0860346	0.108778	0.00175416	4.81579	0.116624	0.318802	0.00546013	1788.89	29.6325	1787.66	20.3978	1783.87	26.7069	99%
EL03-L1-32	437.374	473.655	968.697	0.48896	0.112329	0.00186596	5.11888	0.0863506	0.329665	0.00307023	1838.89	63.1175	1839.24	14.3837	1836.76	14.9179	99%
EL03-L1-33	354.4	1340.63	4030.85	0.332594	0.0579994	0.00113587	0.544771	0.0108787	0.0678597	0.00049824	531.52	42.5875	441.566	7.15687	423.248	3.01643	95%
EL03-L1-34	44.6022	140.26	666.767	0.210359	0.0551039	0.00214823	0.417388	0.0157795	0.0551618	0.000612076	416.715	87.0275	354.182	11.3066	346.134	3.74409	97%
EL03-L1-35	442.673	355.856	1089.46	0.326635	0.111487	0.00186096	4.84574	0.0835517	0.314677	0.00287193	1833.34	29.7875	1792.88	14.5637	1763.68	14.1145	98%
EL03-L1-36	325.541	386.304	744.61	0.5188	0.111523	0.00192249	5.01852	0.0919848	0.32644	0.00350675	1824.38	30.4025	1822.45	15.5681	1821.1	17.0709	99%
EL03-L1-37	201.282	342.436	427.264	0.801464	0.114258	0.00202308	5.23417	0.099265	0.332248	0.00338965	1933.34	31.7875	1858.2	16.217	1849.27	16.432	99%
EL03-L1-38	452.588	230.788	1157.43	0.199396	0.113546	0.00214873	5.20473	0.124565	0.332322	0.00554178	1857.41	28.5475	1853.39	20.4235	1849.62	26.8324	99%
EL03-L1-39	451.662	254.47	1083.89	0.234774	0.113798	0.00233182	5.23941	0.113437	0.333659	0.00342898	1860.81	32.4075	1859.05	18.5036	1856.09	16.6047	99%
EL03-L1-40	546.669	518.136	1285.5	0.403061	0.11382	0.00252752	5.1865	0.120225	0.330335	0.00333177	1861.42	40.585	1850.4	19.7724	1840.01	16.1753	99%
EL03-L1-41	300.079	206.896	697.376	0.296678	0.115088	0.00267926	5.37573	0.128849	0.338548	0.00313908	1881.17	42.7475	1881	20.5599	1879.68	15.1517	99%
EL03-L1-42	348.027	371.225	524.823	0.707334	0.162926	0.00343908	11.0124	0.259895	0.489837	0.00616621	2486.11	35.495	2524.18	22.0354	2569.97	26.7168	98%
EL03-L1-43	377.289	336.499	882.164	0.381447	0.112845	0.0023772	5.13295	0.110122	0.330938	0.0046325	1855.56	38.2725	1841.58	18.2749	1842.92	22.4596	99%
EL03-L1-44	430.253	294.605	1029.74	0.286097	0.115089	0.00243688	5.37205	0.132992	0.338752	0.00517956	1881.17	38.7325	1880.41	21.2307	1880.66	24.9615	99%
EL03-L1-45	458.669	408.05	1088.86	0.374749	0.111148	0.00185662	4.99469	0.0937911	0.325726	0.00353973	1818.21	31.3275	1818.42	15.9344	1817.63	17.2401	99%
EL03-L1-46	104.213	129.654	153.886	0.842537	0.162065	0.00309501	10.3291	0.211878	0.462707	0.0051517	2477.46	26.7	2464.71	19.0637	2451.5	22.743	99%
EL03-L1-47	184.597	208.63	424.482	0.491493	0.113418	0.00201645	5.13767	0.0946992	0.32921	0.0035878	1854.63	26.8525	1842.36	15.7165	1834.55	17.4283	99%
EL03-L1-48	419.516	1240.27	1571.72	0.789118	0.0787342	0.00125896	2.13475	0.0460813	0.196782	0.00325253	1164.82	26.85	1160.12	14.9471	1158.01	17.5307	99%
EL03-L1-49	122.524	147.189	281.2	0.523434	0.110775	0.00224423	4.98061	0.110989	0.326217	0.00417036	1812.96	37.0375	1816.04	18.884	1820.02	20.2949	99%
EL03-L1-50	661.37	500.392	1798.71	0.278195	0.111208	0.00173237	4.95467	0.148898	0.324816	0.00965054	1820.37	28.3975	1811.62	25.4197	1813.21	46.9687	99%
EL03-L1-51	602.168	758.392	978.646	0.77494	0.16355	0.00258312	9.61965	0.169033	0.426229	0.00362853	2494.45	27.3175	2399.05	16.244	2288.7	16.4471	95%
EL03-L1-52	447.709	428.575	709.536	0.604021	0.164078	0.00228871	10.2898	0.171473	0.455854	0.00531626	2497.84	22.6875	2461.19	15.5125	2421.23	23.5763	98%
EL03-L1-53	537.928	518.118	1219.49	0.424863	0.115325	0.00176436	5.3599	0.0867338	0.33755	0.00315917	1884.88	32.5625	1878.47	13.9062	1874.87	15.2595	99%
EL03-L1-54	815.906	104.642	2519.73	0.041529	0.118183	0.0016493	4.50653	0.0932571	0.276649	0.0043347	1928.71	24.2325	1732.18	17.2366	1574.46	21.9045	90%
EL03-L1-55	348.141	403.791	762.388	0.52964	0.122634	0.00189628	6.09196	0.13928	0.360928	0.00650575	1994.75	26.695	1989.1	19.9871	1986.57	30.835	99%
EL03-L1-56	255.3	320.179	619.237	0.517054	0.118532	0.00202641	5.01417	0.0930294	0.307238	0.00273053	1944.45	30.56	1821.72	15.7551	1727.1	13.4974	94%
EL03-L1-57	331.913	293.923	769.538	0.381948	0.115391	0.00197019	5.28515	0.0989073	0.3329	0.00335984	1887.04	30.86	1866.47	16.0291	1852.42	16.2802	99%
EL03-L1-58	245.605	271.673	546.497	0.497117	0.116233	0.00205726	5.39766	0.102042	0.337353	0.00306543	1899.08	-0.9225	1884.48	16.2459	1873.92	14.8108	99%
EL03-L1-59	209.248	219.347	502.988	0.436089	0.113493	0.00192026	4.99329	0.099855	0.319313	0.00377587	1857.41	31.0225	1818.19	16.9626	1786.37	18.4748	98%
EL03-L1-60	297.903	155.577	713.697	0.217987	0.114053	0.00170268	5.27984	0.0893488	0.335645	0.00321503	1865.13	26.3875	1865.61	14.5023	1865.69	15.5498	99%
EL03-L1-61	304.578	404.811	785.221	0.515537	0.119413	0.00173382	4.77488	0.0741482	0.289845	0.00226107	1947.22	25.9275	1780.49	13.0934	1640.76	11.3351	91%
EL03-L1-62	131.238	253.043	278.195	0.909588	0.112415	0.00196511	5.08577	0.0930117	0.329218	0.00377938	1838.58	31.48	1833.73	15.5686	1834.59	18.3559	99%
EL03-L1-63	433.96	471.902	968.577	0.487212	0.115412	0.00201912	5.35292	0.0996293	0.336231	0.00323702	1887.04	31.4775	1877.36	15.9748	1868.51	15.649	99%
EL03-L1-64	475.473	292.411	1220.93	0.239499	0.11169	0.0017788	5.03977	0.113902	0.326826	0.00577005	1827.78	29.63	1826.03	19.1889	1822.98	28.0512	99%
EL03-L1-65	298.773	263.287	459.808	0.572603	0.157658	0.00314615	10.1162	0.224792	0.464769	0.00617836	2431.48	32.8675	2445.45	20.6004	2460.58	27.2232	99%
EL03-L1-66	38.9031	421.677	660.02	0.638885	0.0542611	0.00181045	0.327619	0.010634	0.0439817	0.000490991	388.94	74.0675	287.747	8.13539	277.466	3.03549	96%
EL03-L1-67	58.4357	565.256	801.539	0.705214	0.0529674	0.00150443	0.396141	0.0115191	0.0541638	0.000632647	327.835	64.8075	338.845	8.38074	340.034	3.87311	99%
EL03-L1-68	418.14	215.933	1060.97	0.203524	0.109701	0.00191431	4.81053	0.0819288	0.317859	0.00251019	1794.75	31.7875	1786.74	14.3684	1779.26	12.3163	99%
EL03-L1-69	319.285	348.055	1323.14	0.263053	0.0819323	0.00154671	2.20285	0.046003	0.194847	0.00242861	1244.13	37.0375	1181.95	14.6062	1147.58	13.1174	97%
EL03-L1-70	573.258	511.588	1400.05	0.365406	0.108678	0.00196834	4.79111	0.0952857	0.31951	0.0037022	1777.47	33.0275	1783.34	16.7509	1787.34	18.1127	99%
EL03-L1-71	512.209	447.248	1239.18	0.360923	0.109184	0.0024579	4.80698	0.112062	0.319631	0.00439814	1787.04	41.8225	1786.12	19.6323	1787.93	21.5067	99%
EL03-L1-72	413.02	317.555	1027.33	0.309108	0.108068	0.00231536	4.70393	0.110968	0.315502	0.00419222	1768.52	39.045	1767.94	19.7905	1767.72	20.5655	99%
EL03-L1 74	78.7304	74.118	45.5932	1.62564	0.114681	0.00147199	5.38346	0.0722295	0.340468	0.00301383	1875.93	23.3	1882.23	11.5602	1888.92	14.5296	99%
EL03-L1 75	52.9166	64.2887	549.066	0.117087	0.165756	0.00195445	10.8049	0.133685	0.472941	0.00432313	2516.66	19.75	2506.49	11.6244	2496.45	18.9684	99%
EL03-L1 76	229.326	213.943	72.4929	2.95123	0.0592052	0.00138253	0.44136	0.00930787	0.0547386	0.000737269	575.96	54.62	371.211	6.5619	343.549	4.5099	92%
EL03-L1 77	160.324	193.856	32.9149	5.88959	0.113138	0.00117361	5.64071	0.0716112	0.360809	0.0032906	1850.31	18.52	1922.34	11.0273	1986.01	15.625	96%
EL03-L1 78	76.7557	226.157	0	#DIV/0!	0.114905	0.0012221	5.31315	0.0599242	0.335002	0.00268412	1879.63	19.6	1870.98	9.72159	1862.58	12.9999	99%
EL03-L1 80	254.404	701.781	0	#DIV/0!	0.114306	0.00104587	5.23892	0.0555685	0.331858	0.00270775	1868.83	16.665	1858.97	9.13169	1847.38	13.1439	99%
EL03-L1 81	89.7091	701.032	32.3312	21.6828	0.0529214	0.000655408	0.374721	0.00535071	0.0512232	0.000444026	324.13	27.775	323.147	3.95819	322.027	2.72845	99%
EL03-L1 82	89.2879	229.292	45.7673	5.00996	0.168084	0.00149728	11.1126	0.108688	0.478654	0.00356257	2538.58	14.815	2532.61	9.27258	2521.4	15.5911	99%
EL03-L1 83	396.789	511.354	26.9632	18.9649	0.0550768	0.000840036	0.371372	0.00596395	0.0488562	0.000405617	416.715	30.5525	320.67	4.42118	307.496	2.4985	95%
EL03-L1 84	150.452	382.61	22.8644	16.7339	0.115933	0.00116337	5.44825	0.0545108	0.340624	0.00261504	1894.13	22.9925	1892.48	8.67955	1889.67	12.6158	99%
EL03-L1 85	254.575	1153.96	345.678	3.33826	0.0572065	0.00111162	0.304441	0.00599233	0.0386273	0.000530209	498.19	42.59	269.863	4.66807	244.319	3.29347	90%
EL03-L1 86	86.3546	486.752	0	#DIV/0!	0.0532817	0.00082915	0.369331	0.00575018	0.0502671	0.000417225	342.65	35.1825	319.157	4.26938	316.161	2.56656	99%
EL03-L1 87	149.346	557.591	60.7189	9.18316	0.0546979	0.000853501	0.373274	0.00562205	0.049446	0.000321712	398.2	35.18	322.077	4.16265	311.119	1.9833	96%
EL03-L1 88	244.555	392.606	15.6068	25.1561	0.0564611	0.000910782	0.40817	0.00640083	0.0524169	0.00043466	477.82	35.1825	347.557	4.62147	329.343	2.66838	94%
EL03-L1 89	48.8541	98.5505	23.261	4.23673	0.0531436	0.00154762	0.391854	0.0111096	0.0536908	0.000594301	344.5	32.405	335.723	8.10791	337.141	3.64045	99%
EL03-L1 90	158.408	161.979	19.8499	8.16017	0.170859	0.00190623	11.5295	0.134438	0.488584	0.00391192	2566.35	18.8325	2566.98	11.0337	2564.55	16.9973	99%
EL03-L1 91	127.786	164.216	21.4768	7.6462	0.0564843	0.00120382	0.39012	0.00833012	0.0501021	0.000450277	472.265	41.6625	334.457	6.08881	315.148	2.76941	94%
EL03-L1 92	276.597	357.616	5.61294	63.7127	0.0558283	0.00095813	0.473638	0.00786861	0.0615678	0.00053313	455.6	38.885	393.699	5.42832	385.153	3.24413	97%
EL03-L1 93	262.867	405.512	11.7857	34.407	0.115621	0.00129009	5.3833	0.0610711	0.337029	0.00245091	1900	20.0625	1882.2	9.79845	1872.36	11.8601	99%
EL03-L1 94	326.79	314.636	280.04	1.12354	0.168633	0.00190507	10.2554	0.118373	0.440096	0.00293628	2544.13	18.8275	2458.09	10.8088	2351.07	13.2051	95%
EL03-L1 95	101.527	224.849	48.8049	4.60709	0.115206	0.00123553	5.07846	0.0539999	0.319087	0.00198647	1883.03	18.67	1832.51	9.10612	1785.27	9.75567	97%
EL03-L1 96	131.167	306.881	40.5213	7.57333	0.115435	0.00117728	5.34075	0.0591105	0.334939	0.00253805	1887.04	-13.89	1875.41	9.55126	1862.28	12.2974	99%
EL03-L1 97	260.93	220.369	0	#DIV/0!	0.0548793	0.000988159	0.472955	0.00856773	0.0624574	0.000479007	405.605	45.365	393.228	5.91222	390.553	2.914	99%
EL03-L1 98	136.403	208.989	65.7729	3.17744	0.115408	0.00146361	4.88232	0.0749272	0.305849	0.0026626	1887.04	22.22	1799.21	12.9914	1720.25	13.1769	95%
EL03-L1 100	70.121	80.1245	2.76249	29.0044	0.0587643	0.00161194	0.525076	0.0144544	0.0649776	0.000627654	566.7	59.2475	428.537	9.62804	405.826	3.80557	94%
EL03-L1 101	110.914	215.943	39.0774	5.52603	0.113687	0.00103392	5.33901	0.0512339	0.340021	0.00205745	1858.95	16.5125	1875.13	8.30511	1886.77	9.95003	99%
EL03-L1 102	331.93	581.542	12.975	44.8203	0.0542259	0.000870488	0.330746	0.00594762	0.0440896	0.000358135	388.94	37.0325	290.135	4.54243	278.132	2.21629	95%
EL03-L1 104	112.799	922.478	535.339	1.72317	0.114315	0.000924782	4.17822	0.052172	0.264584	0.00275917	1868.83	14.505	1669.76	10.2931	1513.25	14.089	90%
EL03-L1 105	189.091	933.932	136.074	6.8634	0.0574289	0.00145796	0.307209	0.00642123	0.0389668	0.000449912	509.3	55.55	272.015	4.99116	246.425	2.79471	90%
EL03-L1 106	199.289	546.644	88.9432	6.146	0.112476	0.00098974	5.25569	0.0489884	0.338399	0.00189598	1839.82	12.0375	1861.7	8.05163	1878.96	9.18819	99%
EL03-L1 107	535.539	1216.03	112.287	10.8297	0.0592597	0.000708744	0.521247	0.00673201	0.063752	0.000479046	575.96	30.5475	425.984	4.50272	398.403	2.91101	93%
EL03-L1 108	114.114	220.858	11.3843	19.4003	0.0590123	0.000959266	0.627956	0.0152446	0.0765196	0.00123263	568.55	39.805	494.822	9.51425	475.315	7.38572	95%
EL03-L1 110	75.995	354.358	14.0137	25.2865	0.113395	0.0011237	5.21971	0.057621	0.333389	0.0021677	1854.63	17.9	1855.84	9.49104	1854.78	10.5277	99%
EL03-L1 111	471.583	434.138	97.2829	4.46263	0.0578392	0.00133627	0.351457	0.00812363	0.0440712	0.000321972	524.11	49.995	305.817	6.10702	278.019	1.99361	90%
EL03-L34-01	49.7934	29.7213	105.553	0.281577	0.122813	0.00180913	6.14549	0.097653	0.363106	0.00387712	1998.15	30.5525	1996.73	13.9429	1996.88	18.3674	99%
EL03-L34-02	146.252	288.342	303.533	0.949952	0.112671	0.00173044	4.97256	0.0763114	0.320201	0.00329373	1842.9	27.78	1814.67	13.0321	1790.71	16.112	98%
EL03-L34-03	176.757	178.841	266.192	0.671851	0.16898	0.0021518	10.5295	0.139504	0.451241	0.00341327	2547.83	20.525	2482.52	12.4013	2400.77	15.2171	96%
EL03-L34-04	301.221	208.544	681.336	0.306081	0.116801	0.00164225	5.40644	0.0754684	0.335385	0.00241829	1909.26	24.8475	1885.87	12.0299	1864.43	11.7173	98%
EL03-L34-05	328.143	285.931	748.089	0.382216	0.114463	0.00176169	5.29892	0.102561	0.335378	0.00447637	1872.22	27.7775	1868.69	16.5815	1864.4	21.6327	99%
EL03-L34-06	634.385	313.287	1536.21	0.203935	0.110859	0.00188704	4.93309	0.0994662	0.322127	0.00370779	1813.27	30.4025	1807.94	17.0669	1800.11	18.1045	99%
EL03-L34-07	129.418	213.855	522.628	0.409192	0.0860271	0.00204285	2.2014	0.0520262	0.185682	0.00151981	1338.88	45.99	1181.49	16.5206	1097.94	8.28428	92%
EL03-L34-08	124.382	122.906	273.149	0.449958	0.114815	0.0023815	5.31229	0.11324	0.33597	0.00331586	1876.86	37.3425	1870.84	18.2599	1867.25	16.0316	99%
EL03-L34-09	416.336	1147.96	742.409	1.54626	0.114821	0.00211384	5.33052	0.099428	0.3365	0.00242927	1876.86	33.3325	1873.77	15.9985	1869.81	11.7607	99%
EL03-L34-10	342.985	314.623	775.774	0.405559	0.117071	0.0020529	5.4059	0.100448	0.33434	0.00254925	1922.22	31.485	1885.79	15.9733	1859.38	12.3567	98%
EL03-L34-11	289.568	251.147	655.1	0.383372	0.114441	0.00190813	5.27837	0.0895889	0.33483	0.00283978	1872.22	30.71	1865.37	14.5444	1861.75	13.7512	99%
EL03-L34-12	302.996	212.167	696.789	0.304493	0.114062	0.00180442	5.2802	0.0891104	0.335755	0.00300349	1865.13	29.165	1865.67	14.4631	1866.21	14.53	99%
EL03-L34-13	450.025	514.302	1082.03	0.475312	0.112444	0.00181384	4.81977	0.0778356	0.310589	0.0019466	1839.2	61.8825	1788.35	13.6344	1743.6	9.62093	97%
EL03-L34-14	526.161	340.123	1239.15	0.27448	0.112115	0.00176945	5.10038	0.0822209	0.329529	0.00207814	1835.19	28.2425	1836.17	13.7422	1836.1	10.1248	99%
EL03-L34-15	339.996	343.54	797.29	0.430884	0.109912	0.00189093	4.83087	0.0813622	0.319345	0.00293333	1798.15	31.175	1790.29	14.2205	1786.53	14.3649	99%
EL03-L34-16	181.197	117.7	285.704	0.411964	0.160852	0.00293312	10.3071	0.202959	0.465307	0.00472922	2464.5	30.095	2462.74	18.3026	2462.95	20.848	99%
EL03-L34-17	422.149	577.262	962.916	0.599493	0.110063	0.00226354	4.88196	0.103371	0.32173	0.00349593	1811.11	38.12	1799.15	17.8865	1798.17	17.0782	99%
EL03-L34-19	400.933	507.15	912.51	0.555774	0.110653	0.00206777	4.94471	0.0931851	0.323783	0.00245416	1810.18	33.95	1809.92	15.964	1808.18	11.9908	99%
EL03-L34-20	77.1395	252.002	1248.86	0.201786	0.0579248	0.00191775	0.42308	0.0146988	0.0532126	0.000715117	527.815	72.21	358.251	10.4906	334.215	4.38075	93%
EL03-L34-21	87.5666	237.836	1448.32	0.164215	0.0555841	0.00147002	0.391115	0.0107878	0.0509081	0.000456008	435.23	59.2525	335.183	7.87741	320.094	2.80255	95%
EL03-L34-22	213.098	452.076	447.472	1.01029	0.110494	0.00202859	4.89074	0.100612	0.322274	0.00446053	1809.26	33.33	1800.66	17.3856	1800.83	21.7679	99%
EL03-L34-23	455.956	153.437	1118.09	0.137232	0.112365	0.0017328	5.11197	0.0823422	0.329644	0.0025126	1838.89	28.0875	1838.1	13.7365	1836.66	12.222	99%
EL03-L34-24	326.972	269.183	764.281	0.352204	0.113074	0.00194237	5.15672	0.0945923	0.331984	0.00411821	1850.01	30.865	1845.5	15.6508	1847.99	19.9559	99%
EL03-L34-25	274.009	275.34	687.66	0.400401	0.114367	0.00168799	4.77078	0.0761224	0.302297	0.00241661	1870.06	27.6225	1779.77	13.4485	1702.69	11.9976	95%
EL03-L34-26	329.301	286.488	707.229	0.405085	0.119599	0.00203885	5.69529	0.0945115	0.345673	0.00282036	1950.31	30.0925	1930.65	14.3933	1913.9	13.5503	99%
EL03-L34-27	231.135	209.246	405.513	0.516002	0.14258	0.002198	8.33158	0.152279	0.42269	0.00424597	2258.95	26.545	2267.76	16.6412	2272.68	19.2782	99%
EL03-L34-28	360.228	335.782	826.634	0.406205	0.112993	0.00164864	5.13696	0.0752133	0.330808	0.00344382	1847.84	27.3175	1842.24	12.5072	1842.3	16.7114	99%
EL03-L34-29	445.092	247.61	1009.84	0.245197	0.117058	0.0016493	5.56724	0.087496	0.345383	0.00341809	1922.22	24.845	1911.05	13.5903	1912.51	16.4104	99%
EL03-L34-30	294.603	360.551	650.049	0.554651	0.113978	0.00176853	5.25643	0.0847535	0.334678	0.00263484	1864.82	28.0825	1861.82	13.8132	1861.01	12.7657	99%
EL03-L34-31	312.71	255.06	712.729	0.357864	0.115716	0.00163198	5.42512	0.0804445	0.340389	0.00260536	1891.05	25.46	1888.83	12.7776	1888.54	12.5715	99%
EL03-L34-32	337.549	138.197	798.272	0.17312	0.115481	0.00180075	5.38685	0.0892088	0.338646	0.00291835	1887.35	28.8575	1882.77	14.2401	1880.15	14.0903	99%
EL03-L34-33	782.623	681.261	1606.26	0.424129	0.12377	0.00180898	6.25379	0.102536	0.366577	0.00361045	2012.96	25.92	2012.01	14.418	2013.27	17.0659	99%
EL03-L34-34	464.445	330.073	994.92	0.331758	0.12309	0.00169559	6.10351	0.0889658	0.359195	0.00255452	2001.54	24.3775	1990.75	12.7887	1978.36	12.1626	99%
EL03-L34-35	358.045	569.345	758.305	0.750812	0.114238	0.00163359	5.27352	0.0767559	0.334186	0.00211574	1933.34	25.925	1864.59	12.4877	1858.64	10.2718	99%
EL03-L34-36	379.51	357.845	940.571	0.380455	0.115081	0.00188235	4.82996	0.0768295	0.305704	0.00370568	1881.17	29.3175	1790.13	13.4364	1719.53	18.3189	95%
EL03-L34-37	390.855	208.059	910.664	0.22847	0.114531	0.00177948	5.35652	0.0858874	0.337918	0.00262926	1872.53	28.855	1877.93	13.7789	1876.64	12.7089	99%
EL03-L34-38	347.461	137.096	853.418	0.160643	0.112988	0.0019774	5.07776	0.0916897	0.324296	0.00265418	1847.84	31.3275	1832.4	15.3688	1810.68	12.957	98%
EL03-L34-39	388.55	425.582	890.141	0.478107	0.122038	0.00230785	5.41492	0.103966	0.320146	0.00309415	1987.04	33.33	1887.22	16.5061	1790.44	15.14	94%
EL03-L34-40	204.062	255.99	432.418	0.591997	0.114889	0.00257538	5.4081	0.121369	0.339271	0.00326083	1879.63	39.66	1886.14	19.274	1883.16	15.7285	99%
EL03-L34-41	390.591	637.938	857.637	0.743833	0.113067	0.00248257	5.08033	0.109129	0.323681	0.00269625	1850.01	39.66	1832.83	18.2665	1807.68	13.1672	98%
EL03-L34-42	121.562	147.794	258.697	0.571301	0.115068	0.00265163	5.39116	0.119699	0.339657	0.00407672	1881.17	41.665	1883.45	19.06	1885.02	19.6435	99%
EL03-L34-44	420.214	108.269	535.389	0.202225	0.214473	0.00361195	17.1118	0.288981	0.575775	0.0045417	2939.81	27.1575	2941.12	16.3239	2931.49	18.6472	99%
EL03-L34-45	380.512	123.078	898.836	0.13693	0.116596	0.00189488	5.56934	0.0905948	0.345062	0.0026963	1905.56	34.26	1911.37	14.0629	1910.98	12.9636	99%
EL03-L34-46	334.166	232.758	797.054	0.292022	0.113858	0.00180603	5.26437	0.0903632	0.334386	0.00343933	1862.04	33.485	1863.1	14.7015	1859.61	16.6457	99%
EL03-L34-47	453.468	304.411	800.344	0.38035	0.16174	0.00241405	9.74938	0.149691	0.43556	0.00282134	2473.76	24.54	2411.38	14.2345	2330.73	12.7317	96%
EL03-L34-48	701.869	310.232	1755.73	0.176697	0.112991	0.00170221	5.19847	0.103972	0.33252	0.00462273	1847.84	27.625	1852.37	17.0783	1850.59	22.386	99%
EL03-L34-49	264.717	284.835	571.88	0.498067	0.115764	0.00389275	5.57633	0.153926	0.358233	0.00766237	1891.66	59.7225	1912.45	23.8016	1973.79	36.3826	96%
EL03-L34-50	71.8843	218.538	1048.65	0.208399	0.0554407	0.00159164	0.441303	0.012067	0.0583195	0.00112537	431.53	67.585	371.171	8.5048	365.398	6.85767	98%
EL03-L34-51	114.013	722.064	1200.39	0.601526	0.0588013	0.00181559	0.595752	0.0181791	0.073595	0.000532628	561.145	66.655	474.534	11.572	457.778	3.20771	96%
EL03-L34-52	614.479	714.207	1831.99	0.389853	0.114766	0.00148204	4.07863	0.060975	0.257504	0.00236641	1876.24	22.6825	1650.04	12.2424	1477.06	12.1573	88%
EL03-L34-53	472.592	154.322	1099.31	0.140382	0.120953	0.00166134	5.9473	0.0951308	0.356904	0.00438644	1970.06	24.225	1968.17	13.9681	1967.48	20.8663	99%
EL03-L34-54	386.437	295.414	943.825	0.312996	0.113798	0.00157698	5.22451	0.0870432	0.333455	0.00421848	1860.81	25.77	1856.62	14.2551	1855.1	20.4183	99%
EL03-L34-55	255.093	165.409	618.701	0.26735	0.116429	0.00189462	5.48902	0.0974126	0.342028	0.00359498	1902.16	29.48	1898.88	15.2974	1896.42	17.2988	99%
EL03-L34-56	509.223	427.425	1214.46	0.351945	0.115229	0.00190006	5.36333	0.101071	0.337289	0.00380695	1883.64	29.625	1879.02	16.1783	1873.61	18.3793	99%
EL03-L34-57	324.308	432.281	738.208	0.585582	0.114374	0.00186385	5.23652	0.0888756	0.331766	0.00233041	1870.06	29.3225	1858.58	14.5251	1846.93	11.3244	99%
EL03-L34-58	175.524	140.69	408.727	0.344214	0.117084	0.00208965	5.57791	0.118775	0.344977	0.00411811	1922.22	32.1	1912.69	18.3805	1910.57	19.7648	99%
EL03-L34-59	60.0781	105.357	134.455	0.783587	0.113628	0.00261033	5.1508	0.142185	0.332281	0.00741519	1858.34	41.205	1844.53	23.5057	1849.43	35.8932	99%
EL03-L34-60	369.938	429.436	931.012	0.461257	0.113349	0.00153552	5.21907	0.111239	0.333571	0.0056906	1854.02	25.155	1855.74	18.2057	1855.67	27.5263	99%
EL03-L34-61	53.7444	276.427	424.17	0.651689	0.0696555	0.00350345	0.874084	0.0517339	0.0989023	0.00664006	918.21	102.625	637.783	28.0329	607.973	38.9535	95%
EL03-L34-62	542.799	177.36	1441.55	0.123034	0.111981	0.00138871	5.06482	0.0894553	0.327978	0.00459489	1831.79	22.535	1830.23	15.0284	1828.57	22.3269	99%
EL03-L34-63	411.996	421.413	1016.26	0.414669	0.111835	0.0014177	5.04605	0.0751224	0.326807	0.00301077	1829.32	23.615	1827.09	12.6772	1822.89	14.6612	99%
EL03-L34-64	314.936	170.668	867.695	0.196692	0.11242	0.00151555	5.08922	0.102148	0.32839	0.00545869	1839.2	25.16	1834.31	17.0789	1830.57	26.5084	99%
EL03-L34-65	191.093	435.873	758.035	0.575003	0.076194	0.00137402	2.10981	0.0406634	0.201247	0.0025228	1101.85	39.815	1152.01	13.3001	1182.02	13.5535	97%
EL03-L34-66	227.915	121.761	583.541	0.208659	0.111757	0.0017422	5.04742	0.0911146	0.327585	0.00440332	1828.09	28.86	1827.31	15.3488	1826.67	21.4041	99%
EL03-L34-67	422.491	468.307	1038.54	0.450927	0.109766	0.00139698	4.91055	0.0850238	0.324019	0.00428111	1795.37	24.2275	1804.07	14.6578	1809.33	20.8668	99%
EL03-L34-68	310.021	337.262	741.837	0.454631	0.111311	0.00195988	4.94383	0.0931634	0.32448	0.00745189	1820.68	32.565	1809.77	15.9626	1811.57	36.2825	99%
EL03-L34-69	225.528	305.819	511.232	0.5982	0.113508	0.00220572	5.17957	0.0979644	0.332258	0.00478871	1857.41	35.185	1849.27	16.1459	1849.32	23.1927	99%
EL03-L34-70	184.311	222.746	419.929	0.530439	0.111876	0.00176916	5.05966	0.0825676	0.328904	0.00419478	1831.48	23.6125	1829.37	13.8912	1833.07	20.3726	99%
EL03-L34-71	471.255	585.736	1183.33	0.494989	0.111279	0.00179973	4.59406	0.0744106	0.298711	0.00210485	1820.68	29.4775	1748.19	13.5586	1684.91	10.4874	96%
EL03-L34-72	485.248	277.882	1127.46	0.246468	0.116786	0.00188136	5.42454	0.0886491	0.33586	0.00231766	1909.26	28.2425	1888.74	14.0695	1866.72	11.2296	98%
EL03-L34-73	377.012	132.739	924.125	0.143637	0.114671	0.00181039	5.17577	0.0839039	0.326715	0.00263263	1875.93	23.6075	1848.64	13.8521	1822.44	12.8296	98%
EL03-L34-74	176.719	624.272	2875.92	0.217068	0.0608186	0.00106209	0.413649	0.00684174	0.049385	0.000355306	631.5	69.435	351.5	4.92003	310.745	2.1891	87%
EL03-L34-75	614.352	449.886	1498.84	0.300156	0.112936	0.00149149	5.06155	0.0955663	0.324509	0.00464508	1847.22	19.445	1829.68	16.0568	1811.71	22.6289	99%
EL07-03-01	447.765	140.896	1101.57	0.127904	0.113638	0.00239642	5.3391	0.138857	0.339733	0.00579314	1858.34	37.81	1875.15	22.2784	1885.38	27.8935	99%
EL07-03-02	320.834	102.864	772.022	0.13324	0.115446	0.0022499	5.53378	0.124835	0.346615	0.00456014	1886.73	34.8725	1905.86	19.4433	1918.41	21.8545	99%
EL07-03-03	18.6242	213.214	310.685	0.68627	0.0542556	0.00216126	0.339602	0.0138545	0.0453283	0.000465203	388.94	88.88	296.87	10.5033	285.776	2.873	96%
EL07-03-04	312.348	153.421	725.948	0.211339	0.118857	0.00207151	5.81989	0.126939	0.354059	0.00473303	1939.2	30.4	1949.38	18.9459	1953.95	22.5578	99%
EL07-03-06	26.1419	227.782	409.843	0.555778	0.0586866	0.00213084	0.389553	0.0126815	0.0487834	0.000614907	553.74	77.765	334.043	9.26949	307.048	3.7832	91%
EL07-03-07	245.54	248.298	340.841	0.728487	0.172604	0.00277438	11.7416	0.209803	0.49304	0.0052548	2583.03	21.4525	2584.02	16.8113	2583.81	22.7312	99%
EL07-03-09	275.264	332.35	598.05	0.555723	0.115359	0.00194098	5.39794	0.0921364	0.339307	0.00257744	1887.04	31.015	1884.53	14.6785	1883.34	12.4475	99%
EL07-03-10	342.411	156.306	795.452	0.196499	0.117523	0.00173471	5.56244	0.0825689	0.343038	0.00213021	1920.37	27.01	1910.3	12.8415	1901.27	10.2761	99%
EL07-03-11	382.574	228.572	900.295	0.253885	0.114646	0.00161128	5.26477	0.077066	0.332638	0.00210063	1875.93	24.8425	1863.17	12.5548	1851.15	10.2105	99%
EL07-03-12	159.591	123.106	260.02	0.473447	0.16572	0.00277851	10.1056	0.159616	0.44663	0.00712743	2516.66	28.395	2444.48	14.688	2380.25	31.787	97%
EL07-03-13	235.7	465.941	484.118	0.962453	0.115873	0.00166544	5.36567	0.0744066	0.337038	0.00323735	1894.44	-6.4825	1879.39	11.9372	1872.4	15.6413	99%
EL07-03-15	290.388	253.449	665.573	0.380799	0.115433	0.0015199	5.37834	0.0802711	0.339212	0.00420708	1887.04	23.7625	1881.41	12.8424	1882.88	20.2766	99%
EL07-03-16	114.884	180.001	252.317	0.713391	0.111602	0.00181783	5.09401	0.0828291	0.330802	0.00318934	1825.61	29.3225	1835.11	13.8573	1842.27	15.4812	99%
EL07-03-17	151.893	291.263	314.083	0.927344	0.112908	0.00226388	5.26154	0.114528	0.337973	0.00414707	1846.61	36.575	1862.65	18.6153	1876.91	20.0065	99%
EL07-03-18	467.129	191.184	1028.57	0.185874	0.123759	0.00146475	6.33155	0.0824523	0.370943	0.00362932	2012.96	20.525	2022.83	11.5018	2033.84	17.101	99%
EL07-03-20	245.82	209.673	493.13	0.425188	0.130153	0.00294558	6.87184	0.125748	0.378507	0.00696724	2101.85	39.045	2095.03	16.2825	2069.31	32.6006	98%
EL07-03-21	280.128	218.926	666.81	0.328318	0.114169	0.00142606	5.39461	0.0936138	0.342197	0.00447366	1933.34	27.93	1884	14.9198	1897.23	21.5108	99%
EL07-03-22	300.363	324.074	720.916	0.449532	0.111803	0.00139783	5.00606	0.0693325	0.324348	0.0026035	1828.7	22.8425	1820.35	11.7865	1810.93	12.7105	99%
EL07-03-23	99.5529	147.54	229.63	0.642513	0.111977	0.00200569	5.05544	0.104614	0.32786	0.00440918	1831.79	32.8725	1828.66	17.5859	1828	21.4282	99%
EL07-03-24	45.5735	77.2701	105.278	0.733963	0.111555	0.00285246	4.86366	0.12287	0.321191	0.00526471	1824.99	41.6675	1795.98	21.3119	1795.54	25.7061	99%
EL07-03-25	69.0931	117.42	93.9657	1.24961	0.160311	0.00301141	10.7872	0.236887	0.489478	0.00721757	2458.94	31.3275	2504.97	20.4771	2568.42	31.2682	97%
EL07-03-26	310.2	357.763	442.782	0.807988	0.164539	0.00228145	10.9535	0.172081	0.482236	0.00482547	2502.78	24.23	2519.19	14.7174	2537	21.0312	99%
EL07-03-27	513.142	659.326	1106.78	0.595715	0.117056	0.00321441	5.53501	0.0941054	0.345768	0.00413751	1922.22	49.845	1906.05	14.679	1914.36	19.8462	99%
EL07-03-28	126.605	177.975	272.518	0.653074	0.123724	0.00884261	5.4282	0.119564	0.342091	0.00737893	2010.8	126.388	1889.32	18.9297	1896.72	35.4577	99%
EL07-03-29	256.651	342.024	561.336	0.609305	0.116139	0.00195694	5.50738	0.100074	0.344633	0.00408424	1898.15	-2.93	1901.75	15.6685	1908.92	19.6077	99%
EL07-03-30	108.489	213.418	228.583	0.933656	0.113022	0.00204622	5.31608	0.11091	0.341539	0.00540238	1850.01	32.2525	1871.45	17.8754	1894.07	25.9799	98%
EL07-03-31	250.77	298.721	367.046	0.813851	0.168981	0.00337766	11.4662	0.372144	0.489753	0.00876485	2547.83	33.335	2561.83	30.3616	2569.61	37.9524	99%
EL07-03-32	177.434	280.227	395.242	0.709003	0.11622	0.00206367	5.31475	0.0924501	0.331291	0.00274432	1899.08	32.565	1871.24	14.9199	1844.64	13.3259	98%
EL07-03-33	447.037	597.828	847.016	0.705804	0.13094	0.00214285	7.03852	0.118313	0.388697	0.00332204	2110.8	27.9325	2116.31	15.0139	2116.78	15.4634	99%
EL07-03-34	417.07	497.854	586.832	0.848376	0.16869	0.00260913	11.2724	0.201542	0.483328	0.00581613	2546.29	25.9275	2545.93	16.7646	2541.75	25.3136	99%
EL07-03-35	237.484	231.482	464.309	0.498551	0.129905	0.00201856	6.91643	0.112659	0.384825	0.00334536	2098.15	27.47	2100.77	14.5204	2098.78	15.614	99%
EL07-03-36	268.755	157.721	618.619	0.254957	0.116956	0.00177414	5.59031	0.0847721	0.345456	0.00249585	1910.18	27.78	1914.61	13.1257	1912.86	12.0028	99%
EL07-03-37	82.2891	755.032	1100.53	0.68606	0.0537252	0.00150266	0.41395	0.0108872	0.0557873	0.000418286	366.72	62.9575	351.716	7.82192	349.955	2.56095	99%
EL07-03-38	1402.13	1027.81	2158.92	0.476077	0.165452	0.00267032	10.9402	0.254742	0.477745	0.00908369	2512.03	27.1625	2518.06	21.7306	2517.43	39.6494	99%
EL07-03-39	61.4774	932.907	743.331	1.25504	0.0542819	0.00181423	0.404161	0.0138413	0.0539601	0.000595288	383.385	75.9175	344.662	10.0117	338.789	3.6456	98%
EL07-03-40	118.666	170.014	254.261	0.668659	0.113819	0.00246837	5.27294	0.12052	0.334995	0.00413736	1861.42	39.1975	1864.49	19.5494	1862.55	20.0037	99%
EL07-03-41	33.7293	525.278	444.199	1.18253	0.0542286	0.00189395	0.368645	0.0118922	0.0496555	0.000587831	388.94	77.77	318.649	8.82538	312.406	3.61408	98%
EL07-03-42	290.133	172.322	674.262	0.255572	0.113478	0.00216776	5.27126	0.103477	0.335392	0.00289837	1857.41	39.66	1864.22	16.8019	1864.47	14.0277	99%
EL07-03-43	420.013	437.09	654.771	0.667547	0.153671	0.00267794	9.58927	0.206417	0.450222	0.00604537	2387.35	29.6275	2396.14	19.8598	2396.24	26.9036	99%
EL07-03-44	722.152	244.088	1740.56	0.140235	0.1194	0.00199421	5.91148	0.167226	0.355971	0.00767399	1947.22	29.9425	1962.92	24.6038	1963.05	36.4983	99%
EL07-03-45	20.8175	168.595	261.717	0.644188	0.0541472	0.00279237	0.434172	0.0211389	0.0588255	0.00138438	375.98	121.285	366.134	14.9682	368.479	8.43083	99%
EL07-03-46	254.818	314.643	579.435	0.543016	0.110594	0.00164877	4.97392	0.0838149	0.325262	0.00324312	1808.95	26.39	1814.9	14.2993	1815.37	15.8058	99%
EL07-03-47	57.5767	650.439	714.146	0.910793	0.0536636	0.00130413	0.413895	0.00997262	0.0562327	0.000781879	366.72	53.7	351.676	7.16579	352.674	4.77578	99%
EL07-03-48	360.559	167.483	885.334	0.189175	0.115134	0.00169409	5.12468	0.0786615	0.321972	0.00217313	1883.34	27.005	1840.21	13.1008	1799.35	10.6414	97%
EL07-03-49	270.416	319.055	396.443	0.804792	0.160412	0.00264291	10.2346	0.178228	0.463822	0.00538836	2461.11	27.7775	2456.21	16.1945	2456.41	23.7664	99%
EL07-03-50	125.279	156.222	177.266	0.881284	0.163798	0.00259087	10.646	0.200608	0.471685	0.00621917	2495.37	26.855	2492.73	17.5723	2490.95	27.275	99%
EL07-03-51	141.924	184.985	193.479	0.956095	0.165823	0.00257895	10.9122	0.181823	0.477394	0.00453641	2515.74	20.8325	2515.68	15.5925	2515.9	19.8406	99%
EL07-03-52	140.082	171.331	307.933	0.55639	0.114524	0.00181592	5.2812	0.0962552	0.335502	0.00459949	1872.53	29.165	1865.83	15.6117	1864.99	22.2244	99%
EL07-03-53	725.306	841.063	1729.12	0.48641	0.110902	0.00124877	4.95971	0.101168	0.32456	0.00587082	1814.5	20.3725	1812.48	17.2805	1811.96	28.5891	99%
EL07-03-54	468.393	296.953	1067.04	0.278295	0.122731	0.00143508	5.6847	0.0730231	0.335914	0.00267676	1995.99	20.52	1929.05	11.1693	1866.98	12.9559	96%
EL07-03-55	436.571	452.884	981.877	0.461243	0.114357	0.00140045	5.29061	0.0777287	0.335948	0.00362991	1870.06	22.22	1867.35	12.6105	1867.15	17.5446	99%
EL07-03-56	135.149	192.448	299.477	0.642615	0.110661	0.00178635	4.89467	0.0914466	0.321019	0.00390482	1810.18	29.3225	1801.34	15.7997	1794.7	19.0797	99%
EL07-03-57	828.879	1741.06	1624.45	1.07178	0.118082	0.00252913	5.4678	0.132781	0.335638	0.00392916	1927.79	38.275	1895.55	20.8852	1865.65	18.9907	98%
EL07-03-59	59.796	461.548	861.518	0.535739	0.0564644	0.00344965	0.409347	0.0253991	0.0525203	0.000556174	472.265	141.648	348.405	18.3007	329.976	3.41108	94%
EL07-03-61	348.122	106.238	893.832	0.118857	0.103578	0.0101145	4.60582	0.450422	0.321493	0.00372001	1700	180.4	1750.32	81.5938	1797.02	18.1726	97%
EL07-03-62	705.602	47.7467	2545.84	0.0187548	0.0988348	0.0118551	3.21538	0.382264	0.234322	0.00185266	1602.16	224.845	1460.87	92.0837	1357.11	9.70349	92%
EL07-03-63	98.8155	96.336	233.26	0.412999	0.100819	0.0146341	4.58039	0.658548	0.332004	0.00917749	1639.19	272.07	1745.71	119.832	1848.09	44.4269	94%
EL07-03-64	23.1506	164.846	238.39	0.691498	0.0671659	0.0122443	0.636207	0.109059	0.0762078	0.00345658	842.59	387.012	499.955	67.6795	473.448	20.7063	94%
EL07-03-66	176.022	348.379	411.891	0.845802	0.0874933	0.0193888	3.80336	0.80151	0.309358	0.00362759	1372.22	437.5	1593.46	169.435	1737.55	17.8845	91%
EL07-03-68	228.581	115.385	578.295	0.199526	0.0990902	0.0190584	4.61178	0.84815	0.331519	0.00549709	1607.1	365.28	1751.4	153.467	1845.74	26.6323	94%
EL07-03-69	27.8034	255.172	306.339	0.832974	0.0540517	0.010074	0.502628	0.0909515	0.0666641	0.00126116	372.275	374.025	413.48	61.46	416.027	7.62517	99%
EL07-03-70	138.855	375.031	170.735	2.19656	0.137248	0.022699	8.34707	1.32099	0.434773	0.00576929	2194.45	291.355	2269.45	143.509	2327.2	25.9518	97%
EL07-03-71	127.715	223.368	350.839	0.636667	0.115178	0.0175558	4.32615	0.632264	0.271756	0.00740576	1883.34	305.555	1698.36	120.541	1549.71	37.5485	90%
EL07-03-72	68.4901	49.6977	102.51	0.484808	0.157767	0.0220204	10.6443	1.4313	0.481217	0.00594055	2431.79	238.58	2492.58	124.821	2532.57	25.89	98%
EL07-03-73	529.6	547.587	798.362	0.685887	0.150803	0.0155263	9.9889	0.995421	0.474747	0.0056138	2355.25	176.39	2433.76	91.9925	2504.34	24.5763	97%
EL07-03-74	186.057	105.866	294.097	0.359969	0.153871	0.014145	10.3999	0.925868	0.485913	0.00585126	2390.74	157.562	2471.04	82.4836	2552.97	25.4222	96%
EL07-03-75	264.014	295.158	395.528	0.746236	0.152396	0.0123628	10.2722	0.812218	0.484802	0.00649146	2373.15	138.887	2459.61	73.1822	2548.15	28.2169	96%
EL07-03-76	256.24	102.352	629.787	0.162519	0.107498	0.00760973	5.0482	0.346507	0.338301	0.0035106	1757.71	130.713	1827.45	58.1855	1878.49	16.9405	97%
EL07-03-77	482.221	419.493	1294.63	0.324025	0.108281	0.00656599	4.81967	0.293304	0.321064	0.00587617	1772.22	110.035	1788.34	51.1884	1794.92	28.6904	99%
EL07-03-78	325.023	263.254	760.191	0.3463	0.110044	0.00562945	5.29593	0.266247	0.346768	0.00369809	1811.11	97.2225	1868.21	42.9581	1919.15	17.7315	97%
EL07-03-79	334.743	89.8678	834.119	0.10774	0.111061	0.00472673	5.19239	0.217555	0.337536	0.00357204	1816.97	76.6975	1851.37	35.6953	1874.81	17.2456	98%
EL07-03-80	247.691	129.005	397.84	0.324264	0.168596	0.0057825	11.1948	0.387948	0.478612	0.00529483	2543.51	63.12	2539.48	32.348	2521.22	23.1244	99%
EL07-03-81	50.464	875.929	664.811	1.31756	0.0585086	0.00218369	0.404319	0.0149001	0.0501453	0.000557025	550.035	81.4675	344.776	10.7759	315.413	3.42359	91%
EL07-03-82	296.189	464.88	749.529	0.62023	0.116011	0.00201859	4.94933	0.0985852	0.308115	0.00336083	1895.37	31.4825	1810.71	16.8707	1731.43	16.5886	95%
EL07-03-84	546.355	298.315	1522.88	0.195889	0.122574	0.00148409	4.99297	0.0944694	0.295088	0.00489055	1994.44	22.0675	1818.13	16.0535	1666.9	24.3598	91%
EL07-03 85	2053.97	245.002	338.86	0.72302	0.0518636	0.000893421	0.363424	0.00633512	0.0508271	0.000492032	279.69	38.885	314.768	4.72281	319.598	3.02335	98%
EL07-03 86	1354.13	112.041	96.6775	1.15892	0.161043	0.0018424	10.5127	0.134709	0.472922	0.00466228	2466.35	19.91	2481.04	12.0001	2496.36	20.4495	99%
EL07-03 87	945.887	340.585	594.856	0.57255	0.0519326	0.000850023	0.310397	0.00492467	0.0434098	0.000419842	283.395	32.405	274.488	3.82053	273.934	2.59809	99%
EL07-03 88	1232.85	334.272	422.96	0.790315	0.162672	0.00164427	10.7159	0.114401	0.477004	0.0037235	2483.64	17.75	2498.8	10.0593	2514.2	16.3079	99%
EL07-03 89	1040.28	190.484	209.85	0.907714	0.051454	0.00114546	0.341336	0.00772799	0.048166	0.000448138	261.175	56.475	298.184	5.85356	303.252	2.76099	98%
EL07-03 91	630.069	356.768	247.438	1.44185	0.0550535	0.00117863	0.389869	0.00901668	0.0513488	0.000532989	413.01	48.1425	334.274	6.59114	322.797	3.2727	96%
EL07-03 93	664.46	158.523	328.263	0.482915	0.0523574	0.00114623	0.292052	0.0073189	0.0403696	0.000511576	301.91	49.995	260.173	5.75441	255.124	3.17286	98%
EL07-03 94	3333.71	278.174	323.018	0.861171	0.0588242	0.00129075	0.396253	0.0082853	0.048869	0.000426636	561.145	43.51	338.927	6.02964	307.574	2.62739	90%
EL07-03 95	947.922	229.595	320.938	0.715385	0.0590949	0.00130702	0.408974	0.00941425	0.0501053	0.000419891	572.255	48.1375	348.136	6.78854	315.168	2.58325	90%
EL07-03 96	1123.14	24.953	35.8276	0.696475	0.0802847	0.00169587	2.28488	0.0488303	0.206636	0.00189659	1205.56	46.755	1207.63	15.1161	1210.87	10.1536	99%
EL07-03 97	1153.94	13.659	19.4505	0.702243	0.10952	0.00221156	4.63596	0.0910858	0.308545	0.00330719	1791.66	36.73	1755.77	16.4535	1733.54	16.3194	98%
EL07-03 98	0	326.775	400.987	0.814925	0.0543789	0.000893315	0.387453	0.00627549	0.051683	0.000388481	387.09	41.6625	332.507	4.59817	324.846	2.38769	97%
EL07-03 99	707.927	198.838	161.939	1.22786	0.0534439	0.00122372	0.401919	0.00964992	0.0544942	0.000484945	346.35	51.8475	343.039	6.99315	342.055	2.97035	99%
EL07-03 100	1002.53	211.003	261.104	0.80812	0.0553213	0.00100911	0.463982	0.00851799	0.0608625	0.000504491	433.38	40.7375	387.024	5.91373	380.869	3.07247	98%
EL07-03 101	1974.6	85.3163	183.947	0.46381	0.057135	0.00219832	0.301152	0.010126	0.0385109	0.00051462	498.19	89.8025	267.3	7.90417	243.596	3.19714	90%
EL07-03 102	5486.09	712.488	611.52	1.16511	0.0503593	0.00101661	0.311637	0.00500628	0.044888	0.000383334	213.035	46.285	275.449	3.88005	283.06	2.36991	97%
EL07-03 103	1987.68	77.7539	441.296	0.176194	0.11508	0.00106196	5.47324	0.0560098	0.344304	0.00248411	1881.17	16.665	1896.41	8.87975	1907.34	11.9566	99%
EL07-03 104	1226.14	313.051	264.003	1.18579	0.0538636	0.00105329	0.383142	0.00736767	0.0516215	0.000398601	364.87	44.44	329.347	5.41334	324.469	2.44969	98%
EL07-03 106	929.468	211.697	432.073	0.489956	0.0525912	0.000812405	0.36156	0.00564486	0.0498693	0.000432474	322.28	35.18	313.379	4.21505	313.719	2.66088	99%
EL07-03 107	777.599	255.537	246.678	1.03591	0.0562206	0.00128271	0.379359	0.00796647	0.0492339	0.000449004	461.155	49.995	326.566	5.86853	309.817	2.76372	94%
EL07-03 108	10966	527.391	678.837	0.776903	0.113774	0.00110356	5.45526	0.0636619	0.346441	0.00264488	1861.12	18.3625	1893.58	10.0962	1917.58	12.7053	98%
EL07-03 109	2853.77	439.861	523.583	0.840097	0.0581999	0.00112694	0.374396	0.0067636	0.0466103	0.000385402	538.925	47.215	322.906	5.00167	293.677	2.37911	90%
EL07-03 110	1491.12	425.393	449.59	0.946182	0.0553633	0.00105885	0.400639	0.00869858	0.052119	0.000437851	427.825	47.2175	342.111	6.31027	327.518	2.68857	95%
